1

2           **Comparing sequence and structure of falcipains and human**  
3           **homologs at prodomain and catalytic active site for malarial**  
4                           **peptide-based inhibitor design**

5           Thommas M. Musyoka, Joyce N. Njuguna and Özlem Tastan Bishop\*

6           Research Unit in Bioinformatics (RUBi), Department of Biochemistry and Microbiology,  
7           Rhodes University, Grahamstown, 6140, South Africa

8

9

10

11

12           **Corresponding author details:**

13           Research Unit in Bioinformatics (RUBi), Department of Biochemistry and Microbiology,  
14           Rhodes University, P.O. Box 94, Grahamstown, 6140, South Africa

15           Tel: +27-466-038-072

16           E-mail address: [O.TastanBishop@ru.ac.za](mailto:O.TastanBishop@ru.ac.za)

17

## 18 **Abstract**

19 Falcipains are major cysteine proteases of *Plasmodium falciparum* essential in hemoglobin  
20 digestion. Several inhibitors blocking their activity have been identified, yet none of them has  
21 been approved for malaria treatment. For selective therapeutic targeting of these plasmodial  
22 proteases, identification of sequence and structure differences with homologous human  
23 cathepsins is necessary. The protein substrate processing activity of these proteases is tightly  
24 controlled in space and time via a prodomain segment occluding the active site making it  
25 inaccessible. Here, we utilised *in silico* approaches to determine sequence and structure  
26 variations between the prodomain regions of plasmodial proteins and human cathepsins. Hot  
27 spot residues, key for maintaining structural integrity of the prodomains as well as conferring  
28 their inhibitory activity, were identified via residue interaction analysis. Information gathered  
29 was used to design short peptides able to mimic the prodomain activity on plasmodial  
30 proteases whilst showing selectivity on human cathepsins. Inhibitory potency was highly  
31 dependent on peptide amino acid composition and length. Our current results show that  
32 despite the conserved structural and catalytic mechanism of human cathepsins and plasmodial  
33 proteases, significant differences between the two groups exist and may be valuable in the  
34 development of novel antimalarial peptide inhibitors.

35

36 **Keywords**

37 Cysteine protease, Falcipain, Zymogen, Prodomain inhibitory segment, Homology  
38 modelling, Binding affinity

39 **Abbreviations**

|    |                |                                               |
|----|----------------|-----------------------------------------------|
| 40 | Å              | Angstrom                                      |
| 41 | AAI            | Amino acid interaction                        |
| 42 | BIC            | Bayesian Information Criterion                |
| 43 | BP-2           | Berghepain 2                                  |
| 44 | CP-2           | Chabaupain 2                                  |
| 45 | Cat-K          | Cathepsin K                                   |
| 46 | Cat-L          | Cathepsin L                                   |
| 47 | Cat-S          | Cathepsin S                                   |
| 48 | FPs            | Falcipains                                    |
| 49 | FP-2           | Falcipain 2                                   |
| 50 | FP-3           | Falcipain 3                                   |
| 51 | GRAVY          | Grand average of hydropathy index             |
| 52 | K <sub>d</sub> | Dissociation constant                         |
| 53 | KP-2           | Knowlesipain 2                                |
| 54 | KP-3           | Knowlesipain 3                                |
| 55 | MAST           | Motif Alignment Search Tool                   |
| 56 | MEGA           | Molecular Evolutionary Genetic Analysis       |
| 57 | MEME           | Multiple Em for Motif Elucidation             |
| 58 | Mr             | Molecular weight                              |
| 59 | MSA            | Multiple sequence alignment                   |
| 60 | NCBI           | National Center for Biotechnology Information |
| 61 | NNI            | Nearest-Neighbor-Interchange                  |
| 62 | PIC            | Protein Interaction Calculator                |
| 63 | pI             | Isoelectric point                             |
| 64 | PlasmoDB       | Plasmodium genome Database                    |

|    |             |                                                                   |
|----|-------------|-------------------------------------------------------------------|
| 65 | PRODIGY     | PROtein binDIng enerGY prediction                                 |
| 66 | PROMALS3D   | PROfile Multiple Alignment with predicted Local structures and 3D |
| 67 | constraints |                                                                   |
| 68 | PSI-BLAST   | Position-Specific Iterative Basic Local Alignment Search Tool     |
| 69 | RBC         | Red Blood Cell                                                    |
| 70 | VP-2        | Vivapain 2                                                        |
| 71 | VP-3        | Vivapain 3                                                        |
| 72 | YP-2        | Yoelipain 2                                                       |
| 73 | Z-DOPE      | Normalized Discrete Optimized Protein Energy                      |
| 74 | $\Delta G$  | Binding affinity                                                  |
| 75 | 3D          | Three dimensional                                                 |

76

77 **Running Title**

78 Falcipains as malarial drug targets

## 79 **Introduction**

80 Malaria, caused by parasites from the genus *Plasmodium* and transmitted to human by a  
81 female anopheles mosquito bite, is still a devastating disease even though the global  
82 incidences have drastically dropped in recent years [1]. Parallel to evolving mosquito  
83 resistant to insecticides [1–4], continuously emerging resistant strains of parasite to current  
84 drugs [5–8] present an immense challenge for the eradication of malaria. A recent study  
85 promisingly showed that pre-existing resistance may not be a major problem for novel-target  
86 antimalarial candidates, and fast-killing compounds may result in a slower onset of clinical  
87 resistance [9]. Hence, the identification and development of alternative anti-malarial  
88 inhibitors with novel mode of action against new as well as known drug targets with certain  
89 key features are very important.

90 Proteases are considered as good parasitic drug targets and details are presented in a number  
91 of articles [10–16]. Cysteine proteases have a central role in *Plasmodium* parasites during  
92 hemoglobin degradation [17,18], tissue and cellular invasion [19], activation of pro-enzymes  
93 [20,21], immunoevasion and egression [11,21,22]. Red blood cell (RBC) invasion and  
94 rupturing processes as well as intermediate events involving hemoglobin metabolism are  
95 characterised by increased proteolytic activity. During the asexual intraerythrocytic stage,  
96 *Plasmodium* parasites degrade nearly 75% of host RBC hemoglobin [23,24] to acquire  
97 nutrients as they lack a *de novo* amino acid biosynthetic pathway. By this process, they can  
98 acquire all their amino acid requirements necessary for growth and multiplication with an  
99 exception of isoleucine which is exogenously imported as it is absent in human hemoglobin  
100 [10,25,26]. Hemoglobin degradation is an intricate and efficient multistage protein catabolic  
101 process occurring inside the acidic food vacuole [18,27].

102 This study focuses on a subgroup of papain-like Clan CA plasmodial cysteine proteases,  
103 namely Falcipains (FPs) of *P. falciparum* and their homologs. *P. falciparum* has four FPs;  
104 FP-1, FP-2, FP-2' and FP-3. FP-1 is the most conserved protease among the four proteases,  
105 and its role in parasite entry into RBCs is yet to be resolved. Although its inhibition using  
106 specific peptidyl epoxides blocked erythrocyte invasion by merozoites [28], FP-1 gene  
107 disruption in blood stage parasites does not affect their growth [29,30]. Despite its biological  
108 function remaining uncertain, FP-2' is biochemically similar to FP-2 and shares 99%  
109 sequence identity [22,31]. FP-2 (FP-2') and FP-3 share 68% sequence identity and are the  
110 major cysteine proteases involved in hemoglobin degradation in the parasite [32–35].  
111 Expression of these proteins during the blood stage by plasmodia is strictly regulated in a  
112 site-specific and time-dependent manner [28,36,37]. These hemoglobinsases have differential  
113 expression timing during the trophozoite stage: the early phase is characterised by FP-2  
114 abundance while FP-3 is abundant at the late stages [17,22]. It was shown that targeted  
115 disruption of FP-2 gene in plasmodia results in accumulation of undigested hemoglobin in the  
116 food vacuole and its enlargement [17], therefore the protein can be considered as a promising  
117 drug target [38,39]. On the other hand, inhibiting individual proteases might not be essential  
118 due to redundancy in the hemoglobin digestion stage [10], hence any inhibitor design for FPs  
119 should consider blocking the activity of both FP-2 and FP-3. The importance of FP-2 as a  
120 drug target was also indicated in a recent study in which FP-2 polymorphisms were shown  
121 that are associated with artemisinin resistance [40].

122 Other *Plasmodium* species also express proteins highly homologous to FP-2 and FP-3 [41–  
123 44]. These include vivapains (vivapain 2 [VP-2] and vivapain 3 [VP-3]), knowlesipains  
124 (knowlesipain 2 [KP-2] and knowlesipain 3 [KP-3]), berghepain 2 [BP-2], chabaupain 2 [CP-  
125 2] and yoelipain 2 [YP-2] from *P. vivax*, *P. knowlesi*, *P. berghei*, *P. chabaudi* and *P. yoelii*  
126 respectively. All these proteins are related both in sequence and function to the papain-like

127 class of enzymes including human cathepsins. The plasmodial proteases have, however,  
128 unusual features compared to the human ones including, much longer prodomains and  
129 specific inserts in the catalytic domain - a “nose” (~ 17 amino acids) and an “arm” (~ 14  
130 amino acids) [37,45,46]. In native environment, cysteine proteases are regulated either by  
131 their prodomain (zymogen form) or by other endogenous macromolecules like cystatins  
132 [47,48] and chagasin [49]. During erythrocyte entry, *P. falciparum* parasites secrete falstatin,  
133 a potent picomolar inhibitor of both FP-2 and FP-3 thus regulating the activity of these  
134 proteases on important surface proteins required for invasion [19,48]. In the zymogen form  
135 (Figure 1), a part of the prodomain flips over the active pocket and its subsites located on the  
136 catalytic domain [50], blocking its enzyme activity [51]. The acidic environment within a  
137 food vacuole (plasmodia) or lysosome (humans) triggers prodomain cleavage thus activating  
138 the catalytic domain [52,53].

139 The literature comprises a large number of inhibitor studies against FPs including peptide-  
140 based [31,54–56], non-peptidic [50,57–61] and peptidomimetic [58,62,63] studies. Hitherto,  
141 none of these inhibitors has been approved as an antimalarial drug as they have limited  
142 selectivity against host cathepsins, homologs to the parasites proteases. To overcome this,  
143 distinctive features between these two classes of proteins must be determined. Primarily, the  
144 current work utilises *in silico* approaches to characterize FP-2 and FP-3, their homologs from  
145 other *Plasmodium* species as well as human homologs (cathepsins) to identify sequence,  
146 physicochemical and structure differences that can be exploited for peptide-based  
147 antimalarial drug development. Although the two protein classes share high similarity,  
148 important differences that can be essential for inhibitor selectivity exist [50,64]. Our main  
149 aim in this study is to elucidate the inhibitory mechanism of plasmodial prodomain region  
150 responsible for endogenous regulation of the catalytic domain, information which may be  
151 useful in the design of novel inhibitors. For this purpose, using domain-domain interaction

152 approaches, specific hot spot residues critical for the mediation of the prodomain inhibitory  
153 effect were identified.

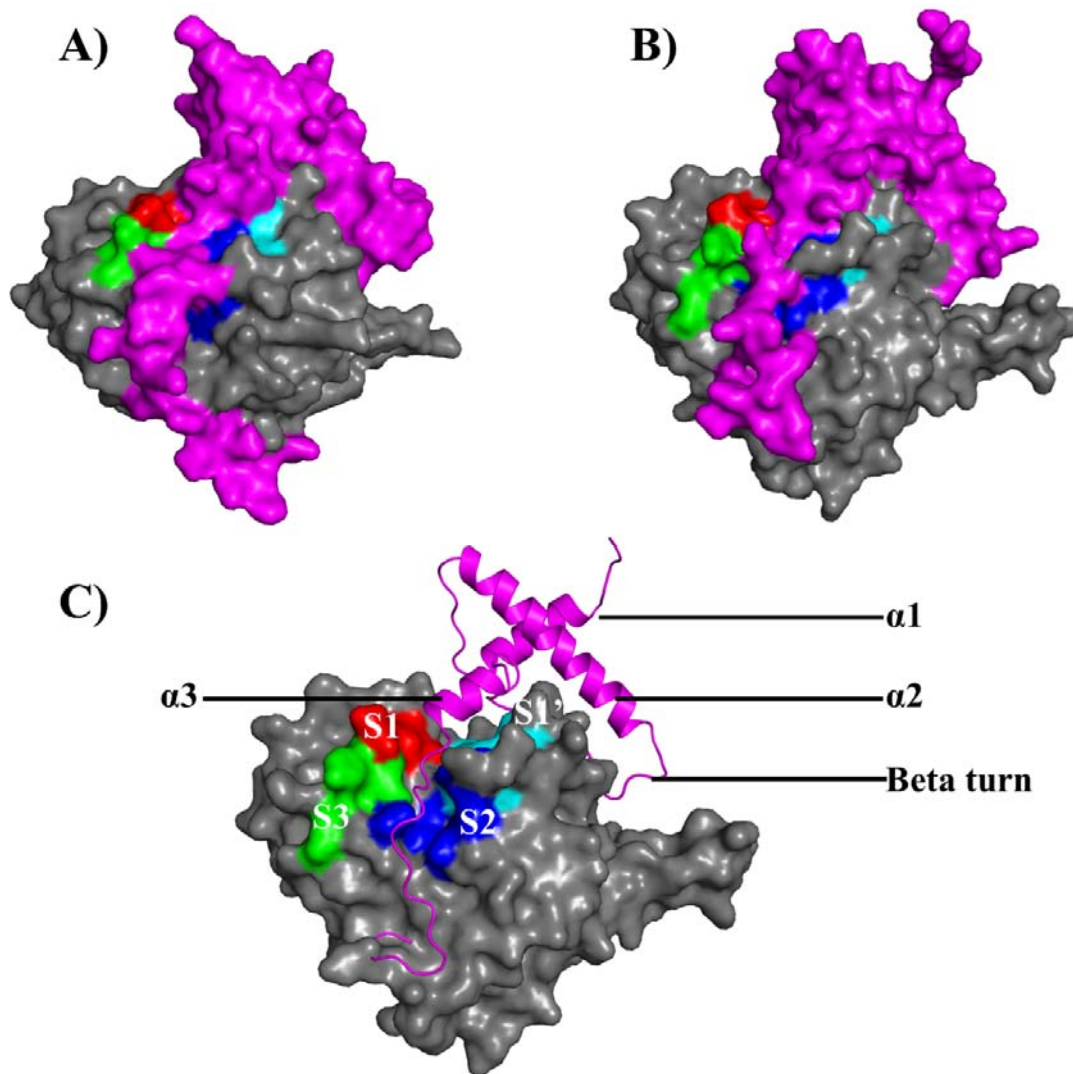

154

155 **Figure 1.** Clan CA cysteine protease zymogen prodomain-catalytic domain interaction  
156 modes. Surface representation of A) human Cat-K and B) FP-2. C) FP-2 prodomain structural  
157 elements (pink; in cartoon representation) interacting with the S1 (red), S2 (blue), S3 (green)  
158 and S1' (cyan) subsites of the catalytic domain.

159

160 To further identify a potential peptide segment, which could strongly bind to the plasmodial  
161 catalytic domains and mimic the native prodomain inhibitory effect, five short peptide  
162 sequences based on the identified hot spot residues were suggested. Flexible docking of these  
163 peptides against the catalytic domains identified a short 13-mer oligopeptide with preferential



164 binding towards plasmodial proteases. This oligopeptide could be a starting platform for the  
165 development and testing of novel peptide based antimalarial therapies against plasmodial  
166 cysteine proteases.

## 167 **Material and methods**

168 A workflow consisting of the different methods, tools and databases used in this study is  
169 shown in Figure 2. Unless otherwise indicated, amino acid numbering is based on individual  
170 protein full length as listed in Table S1.

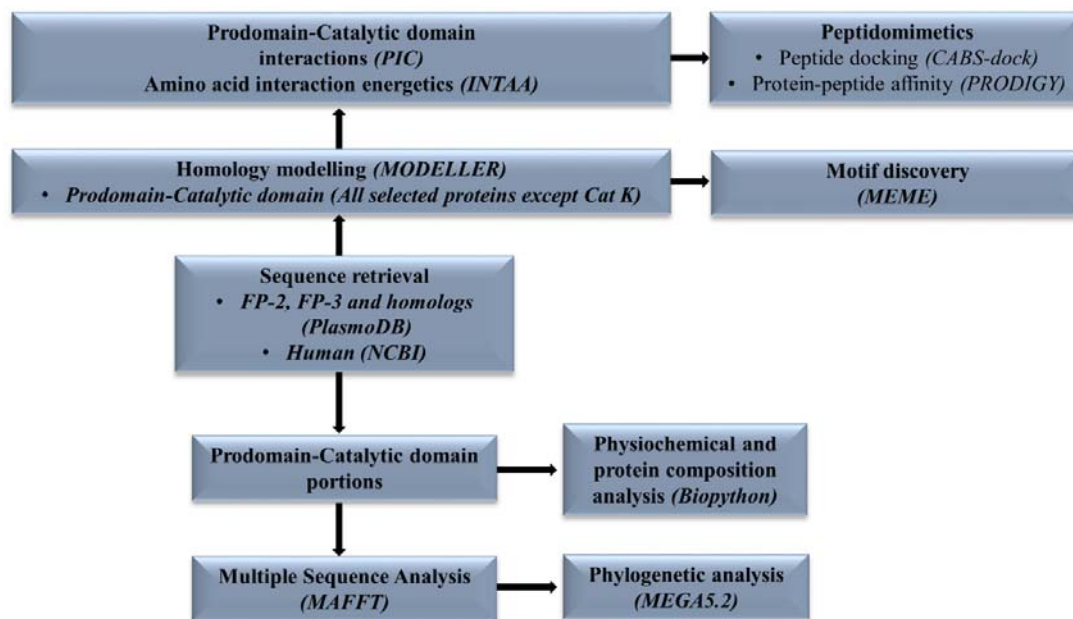

171

172 **Figure 2.** A graphical workflow of the methods and tools (in brackets) used in sequence and  
173 structural analysis of FP-2, FP-3 and their homologs.

174

175 *Sequence retrieval and multiple sequence alignment*

176 Using FP-2 (PF3D7\_1115700) and FP-3 (PF3D7\_1115400) as query sequences, seven  
177 plasmodial protein homologs together with three human homologs (Table 1) were retrieved  
178 from the PlasmoDB version 9.31 [65] and NCBI [66] databases respectively as described  
179 earlier [50]. A pronounced feature present in the cathepsin L (Cat-L) like plasmodial

180 proteases is the presence of an N-terminal signalling (non-structural) peptide sequence (~150  
181 amino acids), which is responsible for targeting them into the food vacuole. For each of the  
182 plasmodial proteins, this segment was chopped off, and the remaining prodomain-catalytic  
183 portion saved into a Fasta file (Text S1). As guided by the partial zymogen complex crystal  
184 structure of Cat-K [PDB: 1BY8], ~ 21 amino acids (N-terminal) were also chopped off from  
185 the human cathepsin prodomain sequences. Together, these sequences were used in the rest  
186 of the study, and are referred as “partial zymogen” or “prodomain-catalytic domain”  
187 sequences interchangeably in the manuscript. Position details of the prodomain and catalytic  
188 portions per protein are listed in Table S1. To determine the conservation of the prodomain-  
189 catalytic portion, multiple sequence alignment (MSA) was performed using PROfile Multiple  
190 Alignment with predicted Local Structures and 3D constraints (PROMALS3D) web server  
191 [67] with default parameters except PSI-BLAST Expect value which was adjusted to 0.0001,  
192 and the alignment output visualised using JalView [68].

### 193 *Phylogenetic inference*

194 Using Molecular Evolutionary Genetic Analysis (MEGA) version 5.2 software [69], the  
195 evolutionary relationship of plasmodial proteases and human cathepsins was evaluated with  
196 the following preferences; Maximum Likelihood (statistical method) and Nearest-Neighbor-  
197 Interchange (NNI) as the tree inference option. A total of 48 amino acid substitution models  
198 were calculated for both complete (100%) and partial (95%) deletion and the best three  
199 models based on Bayesian Information Criterion (BIC) were selected (Table S2). For each  
200 selected model, the corresponding gamma (G) evolutionary distance correction value was  
201 selected to build different phylogenetic trees and comparison was made to determine  
202 robustness of dendrogram construction process. *Toxoplasma gondii* Cat-L [NCBI accession  
203 number: ABY58967.1] was included in the tree calculations as outgroup.

204 *Physicochemical properties*

205 Using an *ad hoc* Python and Biopython script, the amino acid composition and  
206 physicochemical properties, namely molecular weight (Mr), isoelectric point (pI),  
207 aromaticity, instability index, aliphatic index and grand average of hydropathy index  
208 (GRAVY) of the proteins were determined.

209 *Motif analysis*

210 Multiple Em for Motif Elicitation (MEME) standalone suite version 4.10.2 [70] was used to  
211 identify the composition and distribution of protein motifs within partial zymogen sequences.  
212 A Fasta file (Text S1) containing sequence information of the different proteins was parsed to  
213 MEME software with analysis preferences set as; -nostatus -time 18000 -maxsize 16000 -  
214 mod zoops -nmotifs X -minw 6 -maxw 50. The variable X (a whole number from 1) was  
215 varied until no more unique motifs were assessable as determined by motif alignment search  
216 tool (MAST) [71]. A heat map showing motif distribution was generated using an in house  
217 Python script. PyMOL was used to map the different motifs onto the protein structures (The  
218 PyMOL Molecular Graphics System, Version 1.6.0.0 Schrödinger, LLC).

219 *Homology modelling and structure validation*

220 MODELLER version 9.18 [72] was used to build homology models of the inhibitor complex  
221 of all proteins except for Cat-K which has already a crystal structure. Using a combination of  
222 templates, high quality prodomain-catalytic domain complexes of the plasmodial proteases as  
223 well as cathepsins (Cat-L and Cat-S) were calculated by MODELLER with refinement set to  
224 very slow. Table S3 shows the details of templates selected for each protein model. For the  
225 plasmodial proteases, the crystallographic structure of procathepsin L1 from *Fasciola*  
226 *hepatica* [PDB: 2O6X] was used as it had the highest similarity with most target sequences  
227 (30-38%) and high resolution of 1.40 Å. However, it lacked the arm ( $\beta$ -hairpin) region while

228 the nose residues were missing. To overcome these challenges, Cat-K [PDB: 1BY8] together  
229 with FP-2 [PDB: 2OUL] (for FP-2, VP-2, KP-2, BP-2 and YP-2) and FP-3 [3BWK] (for FP-  
230 3, VP-3, KP-3 and CP-2) were additionally used. For Cat-L and Cat-S, only two templates  
231 were used [PDB: 1BY8 and 2O6X]. For each protein, 100 models were calculated and ranked  
232 according to normalized discrete optimized protein energy (Z-DOPE) score [73]. The top  
233 three models per protein were further validated using ProSA [74], Verify3D [75], QMEAN  
234 [76] and PROCHECK [77] and the best quality model selected. Table 2 shows the quality  
235 scores obtained from different homology modelling assessment tools for the top model per  
236 protein. All validation methods gave consistently high quality scores for selected models and  
237 thus could be used for further experiments. QMEAN results showed that only small portions  
238 of the loop regions in Cat-L, Cat-S, and CP-2 were built with poor quality, while the majority  
239 of the prodomain-catalytic core region in all of the proteins was accurate (Figure 3 and Figure  
240 S1).

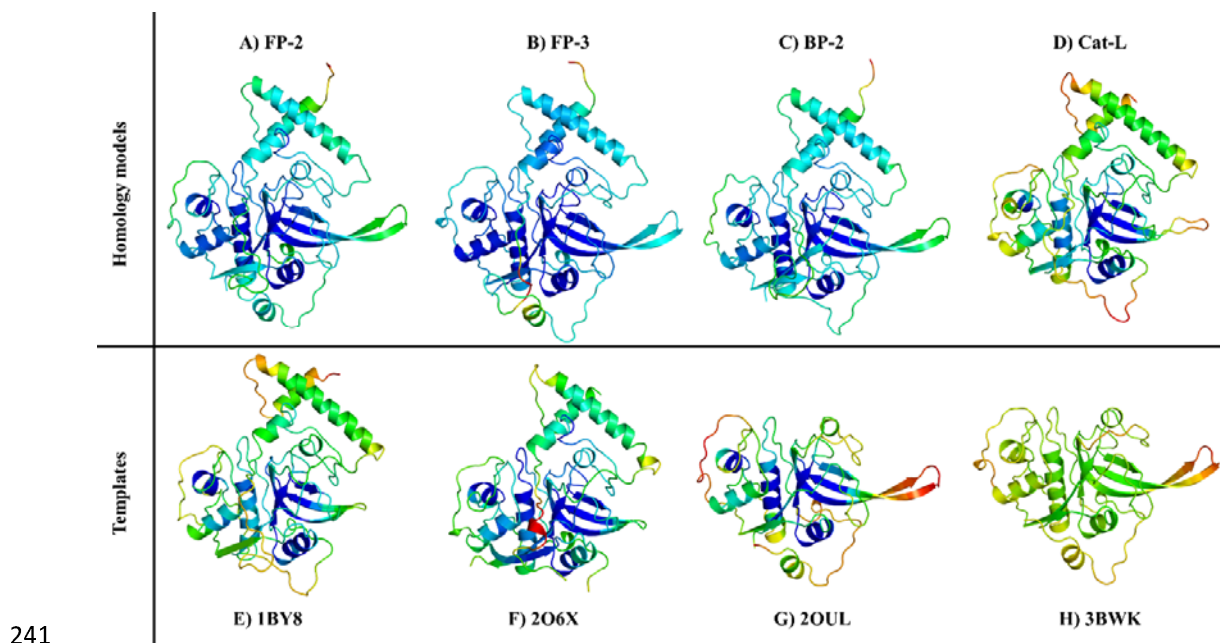

242 **Figure 3.** Homology models of different plasmodial proteases and human Cat-L together  
243 with the templates used in homology modelling. Colour code ranging from blue (accurate  
244 modelling) to red (poorly modelled regions).

245 As these loop regions were far from the catalytic pocket, the resulting models were  
246 considered acceptable for further analysis.

#### 247 *Prodomain-catalytic domain interaction studies and short inhibitor peptide design*

248 To determine the prodomain inhibitory mechanism, residue interactions between prodomain  
249 and catalytic domain of plasmodial and human partial zymogen complexes were evaluated  
250 using the Protein Interaction Calculator (PIC) web server [78]. The interaction energy of  
251 identified residues was evaluated using the amino acid interaction (AAI) web server [79].  
252 PyMOL was used to visualise the resulting interactions. For each protein, prodomain segment  
253 interacting with the catalytic domain's active pocket residues was identified and extracted  
254 into a Fasta file. From the interaction energies, residues within these inhibitory segments  
255 forming strong contacts with subsite residues were identified. Based on the identified hot spot  
256 residues, our next objective was to design short peptide(s) exhibiting the native prodomain  
257 effect whilst showing selectivity on human cathepsins. The conservation of prodomain  
258 inhibitory segments for all the proteins, and separately of only the plasmodial proteases, was  
259 determined using WebLogo server [80]. Peptides of varying lengths and composition based  
260 on amino acid conservation forming contacts with subsite residues were proposed. In order to  
261 evaluate the interaction of selected peptides on the catalytic domains, the prodomain  
262 segments of all proteins were chopped using PyMOL. Blind docking simulation runs of  
263 selected peptides were then performed on these sets of catalytic domains by CABS-dock  
264 protein-peptide docking tool [81] using the default parameters. To confirm the reliability of  
265 the results, docking experiments were repeated using catalytic domains of the same proteins  
266 that had been modelled and used in our previous studies [50]. Binding affinity ( $\Delta G$ ) and  
267 dissociation constant ( $K_d$ ) for each protein-peptide complex was then evaluated using  
268 PROtein binDIng enerGY prediction (PRODIGY) web server [82].

## 269 **Results and discussion**

270 In this work, using combined *in silico* approaches the differences between falcipains and their  
271 plasmodial homologs as well as human cathepsins have been evaluated. Based on observed  
272 differences and interaction energy profiles between prodomain and catalytic domain subsite  
273 residues, short peptides that could mimic the native prodomain inhibitory mechanisms were  
274 proposed.

275 *Both plasmodial and human cathepsins have similar physicochemical properties*

276 Protein function is largely governed by its structure, amino acid composition as well as its  
277 environment. Despite the low sequence identity between the two subclasses (cathepsins and  
278 plasmodial proteases), physicochemical analysis revealed that they have similar aromaticity  
279 and grand average hydropathy (GRAVY) values indicating that both groups of proteins are  
280 hydrophilic (Table 3). With an exception of CP-2, all the other proteins have an instability  
281 index score of  $\leq 40$  and thus can be considered as being stable in test-tube environment [83].  
282 Interestingly, there is no significant difference between the aromaticity, GRAVY and  
283 instability index scores of partial zymogen complex and individual catalytic domains either.  
284 However, significant differences exist in the molecular weight and isoelectric point (pI).  
285 Plasmodial partial zymogens have higher molecular weight than that of human cathepsins, as  
286 they have longer sequences (two additional structural catalytic domain inserts and longer  
287 prodomains). A key factor that controls the functioning of cysteine proteases is pH of the  
288 milieu in which they are found. All the plasmodial prodomain-catalytic complexes and Cat-L  
289 have a slightly acidic pI of  $5.66 \pm 0.37$  with their catalytic domains exhibiting lower pI. The  
290 other cathepsins have basic pI for both their partial zymogen complexes and catalytic  
291 domains. This difference in pI profiles might explain the localization aspects of these proteins



292 where the plasmodial proteases and Cat-L are found in acidic food vacuoles and lysosomes  
 293 respectively while the remaining cathepsins are predominantly found in extracellular matrix.  
 294 *Plasmodial clan CA proteases and human cathepsins exhibit separate evolutionary clustering*  
 295 In addition to the previous findings for catalytic domain conservation discussed in detail in  
 296 ref [7], current MSA identified two highly conserved ERFNIN and GNFD motifs, which are  
 297 located in the  $\alpha$ 2-helix and the adjacent downstream loop region between  $\beta$  turn and  $\alpha$ 3-helix  
 298 respectively (Figure 1 and Figure 4).

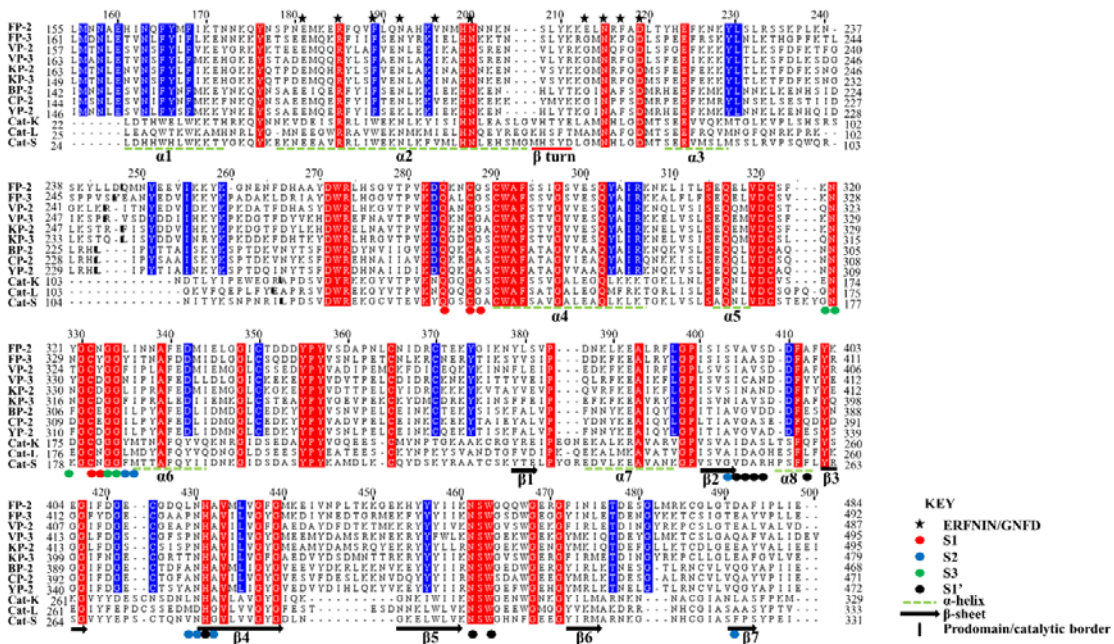

299

300 **Figure 4.** Structural-based multiple sequence alignment of FP-2, FP-3 and homologs  
 301 prodomain-catalytic domains. Actual residue numbering per protein is given on the side, and  
 302 the top numbering is based on partial zymogen alignment. The papain family characteristic  
 303 prodomain ERFNIN and GNFD motif residues are indicated with an asterisk. Bold short lines  
 304 depict prodomain-catalytic domain border. Dashed green lines indicate the position of  $\alpha$ -helix  
 305 and arrows  $\beta$ -sheet structural elements. Fully conserved residues in all the proteins are  
 306 marked with red while residues only conserved in plasmodial proteases with blue. Position of  
 307 subsite residues is shown with filled circles (Red=S1, Blue= S2, Green=S3 and S1'=black).  
 308  
 309 Despite the highly conserved nature of the ERFNIN motif across all the plasmodial proteins  
 310 studied, FP-2 and CP-2 have Val residue in the place of Ile196 (numbering based on FP-2). In  
 311 the human cathepsins, the motif's Phe190 (FP-2 numbering) is replaced by a Trp, a more

312 hydrophobic residue. Using site-directed mutagenesis, Kreusch *et al.*, identified two  
313 additional conserved Trp residues in human Cat-L (position 29 and 32 in Cat-L full length  
314 protein) which together with the highly conserved motifs (ERFNIN and GNFD) are important  
315 in the stability of the partial zymogen complex [84]. In plasmodial proteases, conservative  
316 substitution occurs on these two residues whereby they are replaced by less hydrophobic Phe  
317 residues (position 165 and 169 in FP-2). The contribution of these amino acid variations will  
318 be further discussed in the “*Prodomain regulatory effect mediated by  $\alpha$ 3 helix hydrophobic*  
319 *interactions with subsites S2 and S1’ residues*” section. MSA result also revealed that  
320 cathepsins have a three amino acid insert in the  $\alpha$ 2 helix between the ERFNIN/GNFD motifs  
321 which is absent in the plasmodial proteases, and its importance is yet to be reported.

322 Phylogenetic analysis using partial zymogen sequences gave a distinct clustering between  
323 plasmodial proteins and human cathepsins forming two separate clades (Figure 5). There is  
324 no notable difference in tree topology in analysis performed using the catalytic domains only.  
325 This can be explained by the observed low sequence identity in both partial zymogen (Table  
326 1) and catalytic domain sequences between the two groups of proteins [50]. The plasmodial  
327 proteases further clustered into two main subgroups based on the host. This is attributed to  
328 the previously reported sequence variations between the human and rodent plasmodial  
329 proteases [50]. FP-2 and FP-3 forms a separate sub-group from the other human plasmodial  
330 proteases possibly due to the high sequence similarity between the two proteins. The rate of  
331 mutation accumulation appears to vary between the two classes of proteins, being slowest in  
332 the human cathepsins. All human plasmodial proteases seem to evolve at the same rate as  
333 compared to the rodent orthologs which appear to show the highest substitution rate among  
334 all the proteins.



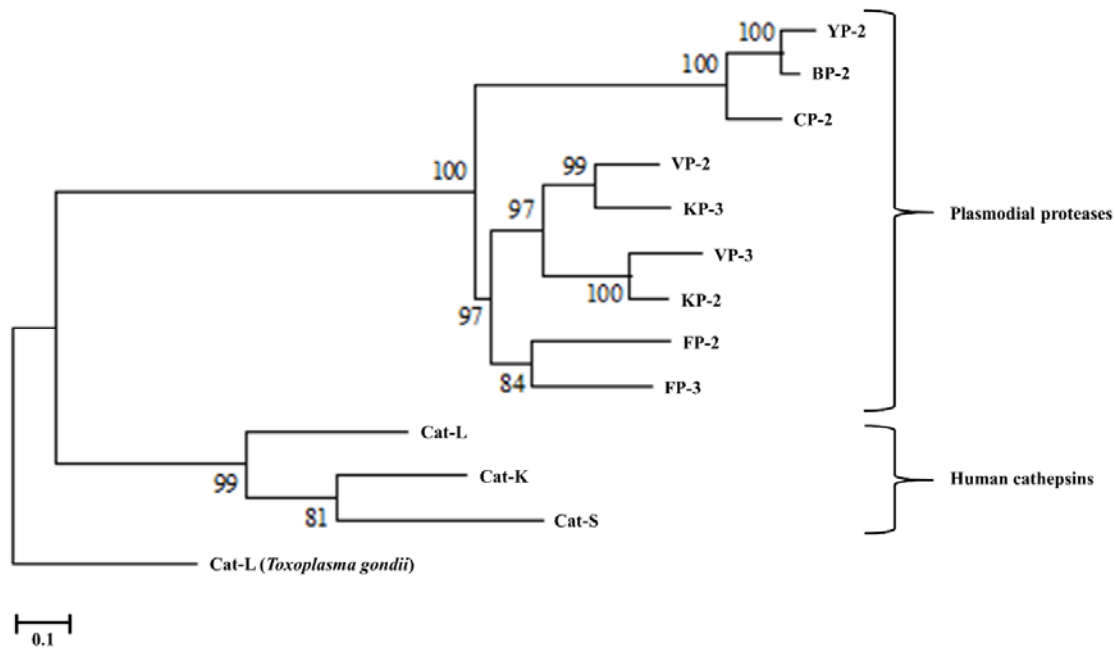

336

337 **Figure 5.** A phylogenetic tree of plasmodial and human FP-3, and FP-3 homologs  
338 prodomain-catalytic protein sequences using MEGA5.2.2. The evolutionary history was  
339 inferred by using the Maximum Likelihood method based on the Whelan and Goldman  
340 model (WAG) model with a  $\gamma$  discrete distribution (+G) parameter of 2.4 and an evolutionary  
341 invariable ([+I]) of 0.1. All positions with gaps were completely removed (100% deletion)  
342 and bootstrap value set at 1,000. The scale bar represents number of amino acid substitutions  
343 per site. *Toxoplasma gondii* CAT-L is used as the outgroup.

343

344 *Plasmodial proteases have unique motifs compared to human cathepsins*

345 Sequence motifs within proteins might be associated with a specific biological function. Thus  
346 to better understand and characterise a group of proteins, identification of common and  
347 distinguished motifs is of critical importance. A total of 13 unique motifs with varied  
348 distributions were identified in the set of proteins studied (Figure 6A). These motifs were  
349 then mapped onto the 3D structures of partial zymogen complexes (Figure 6B and 6C). Five  
350 motifs (M1, M3, M5, M6 and M7) are present in both the plasmodial and human proteases.  
351 Out of these five motifs, M1, M3, M5 and M7 are located at the catalytic domain of all  
352 proteins while M6 is at  $\alpha$ 3-helix region of the prodomain (Figure 6B and 6C). Up to three  
353 motifs; M2, M4 (located in  $\alpha$ 1-helix) and M8 (nose region) are only found within the  
354 plasmodial proteases, except FP-2 lacks M8. A differential motif composition of the anterior



367 N-myristoylation site), and PS00006 (casein kinase II phosphorylation site). M2 (PF00112) is  
368 a characteristic functional site of papain-like family cysteine proteases located at the C-  
369 terminus ( $\alpha 7$ -helix to  $\beta 4$ ), and forms part of the arm region of plasmodial proteases. M3 is  
370 located in  $\alpha 6$ -helix, and the adjacent loop regions of all the Clan CA group of enzymes have  
371 no function assigned to it. M4 (PF08246) is known as the cathepsin propeptide inhibitor  
372 domain (Inhibitor I29), and is located at  $\alpha 1$  and  $\alpha 2$  helices of the N-terminus. The other  
373 motifs had no defined function assigned to them according to these webservers.

374 *Prodomain regulatory effect mediated by  $\alpha 3$  helix hydrophobic interactions with subsites S2*  
375 *and S1' residues*

376 Different non-canonical interactions were identified between the prodomain and catalytic  
377 domain of proteins. These included hydrophobic, cation- $\pi$ , ionic, aromatic-aromatic and  
378 hydrogen bonds. In all partial zymogen complexes studied, no disulphide linkages between  
379 the two domains were observed. The main interactions exhibited are hydrophobic and  
380 hydrogen bonds, which participated either in anchoring and maintaining the folding integrity  
381 of the prodomain segment, or in mediating its inhibitory effect by interacting with subsite  
382 residues (Table S4). Our residue interaction results revealed that prodomain anchoring  
383 residues are located on the region between  $\alpha 1$ -helix and the  $\beta$ -turn which interacted with  $\beta 3$   
384 and part of the arm region in the catalytic domain. Additionally, the C-terminus of the  
385 prodomain interacts with the N-terminus of the catalytic domain and part of  $\beta 3$  (Figure 7). A  
386 strong hydrogen and hydrophobic interaction network running from the N-terminal end to the  
387 GNFD motif prodomain residues, possibly for maintaining its structural fold, was identified  
388 in all proteins. In comparison with the human cathepsins, the plasmodial proteases had longer  
389 N-terminal prodomain regions with a series of highly conserved residues *viz.* Met156,  
390 Asn158, Glu160 and Asn163 (FP-2 numbering). These residues formed a hydrophobic  
391 interaction network with bonds of the order  $< -10.0$  kJ/mol. Two additional aromatic-



413 mutated with an alanine residue and their interaction energy contribution with Arg185 was  
414 determined. A complete loss of interaction for Glu70Ala mutation was observed (0.6 kJ/mol)  
415 while Asp65Ala energy dropped by half to -12.5 kJ/mol, an indication that the ionic pair  
416 between Arg31 and these two positions play a critical biological function. These two residues  
417 are fully conserved in all of the proteins studied here. The second predicted salt bridge by  
418 Glu210-Lys403 (FP-2 numbering) has high residue variation across the proteins. For the  
419 charged Glu210 position in FP-2, all the other plasmodial proteases and Cat-S have a polar  
420 residue (Gly) while the other cathepsins have a non-polar residue (Ala). The majority of the  
421 residues in position Lys403 are mainly charged except KP-3, CP-2 and Cat-K in which have  
422 a polar residue. The energetic contribution from the interactions forming this second salt  
423 bridge were all weak ( $< -1.0$  kJ/mol). However, PIC interaction results showed that position  
424 209 in FP-2 consisted of highly conserved positively charged residue (mostly Lysine) across  
425 the other plasmodial proteases which formed strong ionic contacts with Asp398 (fully  
426 conserved in all plasmodial proteases) in the  $\alpha$ 8-helix region, an indication that the second  
427 salt bridge was most likely formed by these residues. In addition, the mutagenesis study  
428 identified aromatic-aromatic interactions in FP-2 between Phe214, Trp449 and Trp453 to be  
429 also important in the activation. These residues were conserved in all proteins and formed  
430 strong interactions, an indication that they are of functional importance as in FP-2.

431 A specific aim of this study was to determine the responsible residues that confer the  
432 prodomain with its inhibitory function. From residue interaction results, only a small portion  
433 of the prodomain (~22-mer) had significant contacts with individual protein subsite residues  
434 and was responsible for the inhibitory effect (Figure 8). The main residues mediating the  
435 inhibitory effect are located between the  $\alpha$ 3-helix and the inter-joining loop region, which  
436 mostly interact with subsite S2 and S1' residues via hydrophobic interactions and hydrogen  
437 bonds (Table S4). This correlates to our previous findings where residues forming these two



438 subsites were found to be critical in the inhibitory effect and selectivity using non-peptide  
 439 inhibitors [50].

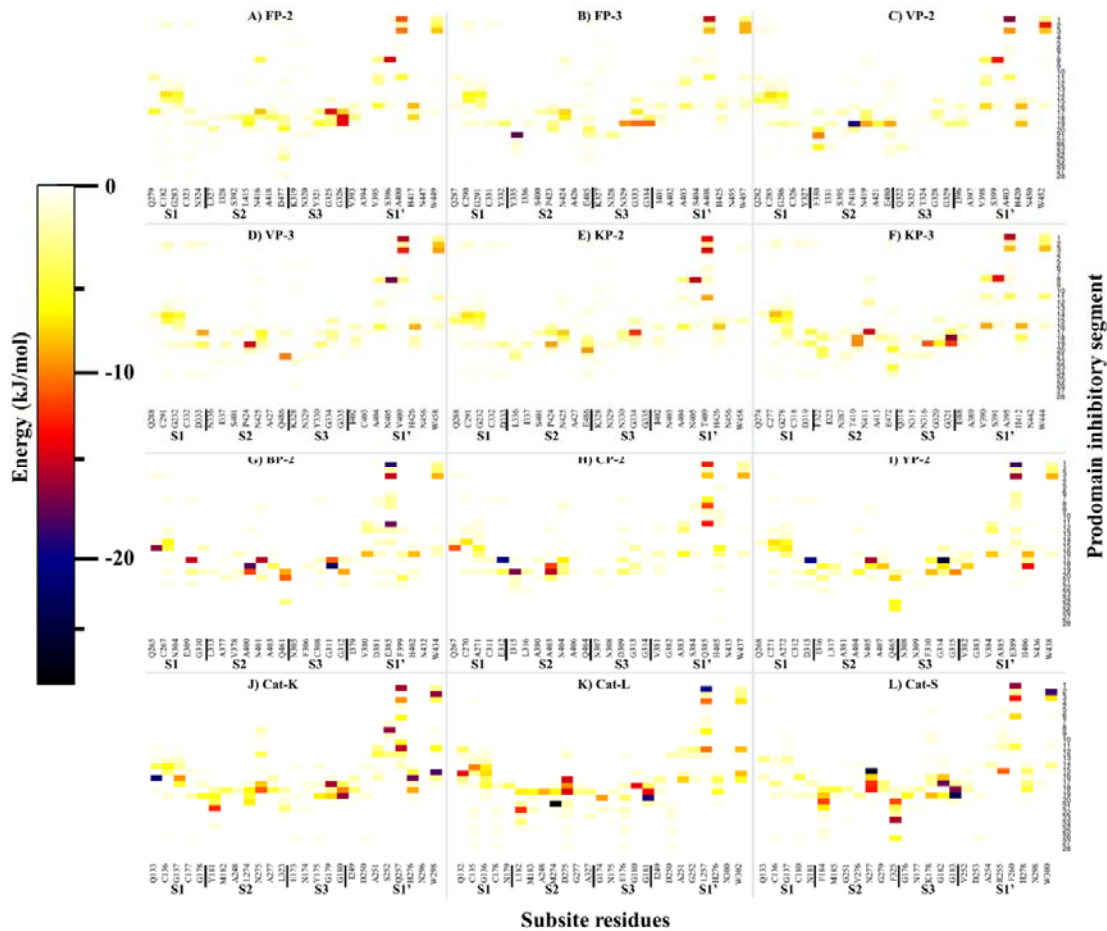

440

441 **Figure 8.** A heatmap for residue interaction energies between prodomain inhibitory segment  
 442 and the catalytic subsite residues per protein. The inhibitory segment starts from the  
 443 conserved Asn residue in the GNFD motif (Figure 4).

444

445 A common interaction profile between the prodomain inhibitory segment and the catalytic  
 446 subsites of the different proteins is observed (Figure 8). For subsite S1, a limited residue  
 447 contact network was observed mainly with residues located at the  $\alpha$ 3-helix in all the  
 448 proteases. The C-terminal end of prodomain segment mainly exhibits contacts with S2 and S3  
 449 subsites, with human cathepsins and rodent plasmodial proteases forming stronger  
 450 interactions than the human plasmodial counterparts. In our previous study, high residue  
 451 variation across the proteins in S2 as well as S1' subsites was reported [50]. In all the proteins,

452 the first three prodomain inhibitory segment amino acids form strong hydrophobic contacts  
453 with residues at the opening of S1' subsite (Figure 8). Rodent plasmodial proteases have  
454 additional hydrogen bonding network, due to presence of charged residues at the fourth or  
455 fifth S1' position. From the interaction energy results, there are no observable contacts  
456 between residues Ala218 to Thr221 (FP-2 numbering) with any of the proteins' subsite  
457 residues. However, a strong hydrogen bonding network is formed between prodomain  
458 Ser231, Leu232, Arg233 with Leu429, Asn430 (S2), Val406, Ala412 (S1') and Gly334-335  
459 (S3). Lys236 residue forms very strong ionic interactions with Asp491 (S2), a position  
460 mainly occupied by charged residues only in the human plasmodial proteases. The side-chain  
461 of Ser228 in FP-2 forms hydrogen bonding with thiol group of catalytic Cys285. A similar  
462 trend with other plasmodial proteases was observed (Table S4). From the interaction  
463 fingerprint, residues that are key in anchoring and maintaining the stability of the prodomain  
464 as well as mediating its catalytic domain regulatory effect were identified per protein.

#### 465 *Peptide inhibitory effect and selectivity dependent on composition and length*

466 Despite their poor chemical properties, peptides remain a promising class of enzyme  
467 modulators as they are chemically diverse, highly specific and relatively safe [88,89].  
468 Designing peptide based inhibitors requires prior understanding of how an enzyme  
469 recognizes its native peptide substrate then modifying the resulting interactions. Additionally,  
470 hot spot residues that regulate protein-protein/domain interactions may provide valuable  
471 insights. For FP-2, three peptide studies based on its prodomain-catalytic domain interaction  
472 network have already been performed. Rizzi *et al.*, who designed peptidomimetics based on  
473 the interaction information between cystatin and FP-2 [90]. A major limitation of this study  
474 was that it was limited to FP-2 and the broad inhibitory potency of resulting cystatin mimics  
475 to other plasmodial proteases was necessary. Another study by Korde *et al.*, using a synthetic  
476 15-mer oligopeptide based on the N-terminal extension of FP-2 partial zymogen

477 (LMNNAEHINQFYMF) showed that it could inhibit substrate processing activity of  
478 recombinant FP-2 *in vitro* [91]. However, our interaction fingerprint results showed that this  
479 terminal extension was not the native inhibitory segment and was not interacting with any of  
480 FP-2 catalytic domain subsite residues. Lastly, Pandey *et al.*, expressed the whole prodomain  
481 of FP-2 together with truncated segments and evaluated their inhibitory ability against a  
482 series of papain-family cysteine proteases. At the end, they determined that a FP-2 prodomain  
483 segment (Leu127-Asp243) which included the ERFNIN and GNFD motifs had a broad  
484 inhibitory activity against FP-3, BP-2, FP-2, Cat-L, Cat-B and cruzain [92]. Considering its  
485 length and molecular mass, the therapeutic potential of this peptide is uncertain.

486 In our study, peptides aimed at mimicking the inhibitory prodomain segment were designed  
487 and tested based on the identified prodomain-catalytic domain interaction fingerprint (Figure  
488 8). Initially, a 22-mer peptide (peptide 1 = NRFGDLSFEEFKKKYLNLKLF) based on the  
489 conservation of the prodomain segments responsible for the inhibitory mechanism for all the  
490 proteases was selected for docking against the catalytic domains of individual proteins using  
491 the CABS-dock webserver (Figure 9). CABS-dock performs blind docking simulations to  
492 identify the most probable binding site while maintaining the flexibility of the peptide ligand  
493 [81]. The  $\Delta G$  of top protein-peptide complex model per protein was then determined using  
494 the PRODIGY server. A portion of this peptide interacted with active pocket residues of  
495 individual proteins and formed complexes exhibiting high binding affinities as that of a FP-  
496 2/Chagasin X-ray crystal complex [PDB: 2OUL] (Table 4). Despite the high predicted  
497 affinity scores with peptide 1, no differential binding was observed with the human  
498 cathepsins. As its N-terminus had highly conserved GNFD motif residues responsible for  
499 anchoring and maintaining the prodomain integrity, we chose to find out if a shorter peptide  
500 lacking these residues would bind differently. Thus, a different set of docking experiments  
501 with a peptide (peptide 2 = LTYHEFKNKYLSLRSSK) derived from the main inhibitory



502 segment of FP-2 was performed. Despite the variation in length, peptide 2 had similar results  
 503 to peptide 1 and lacked differential binding affinity profile between the two protein classes.

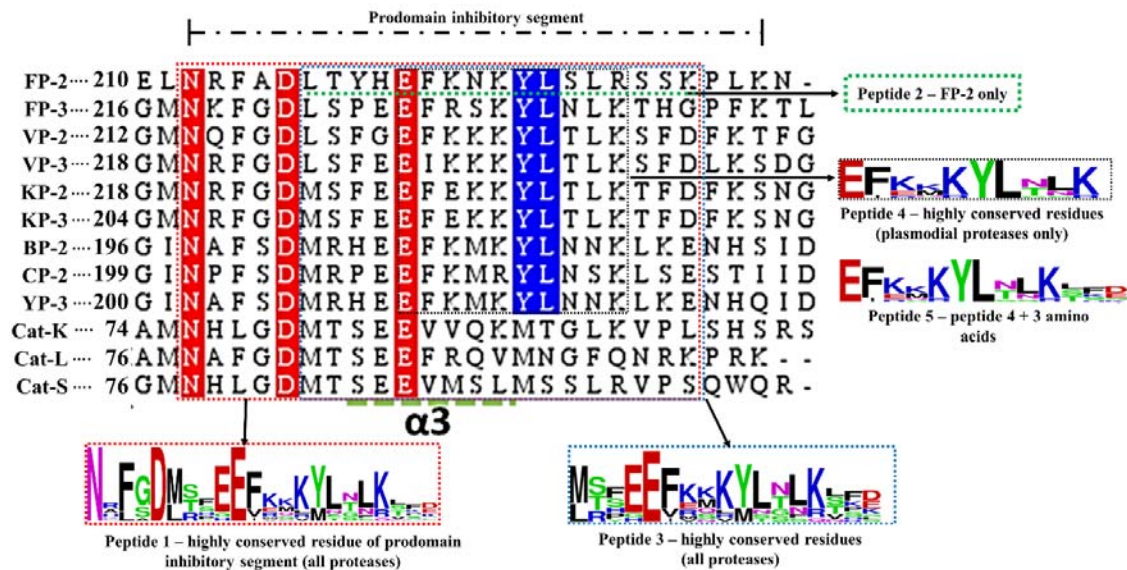

504

505 **Figure 9.** Sequence alignment of the prodomain inhibitory segment for the plasmodial and  
 506 human cathepsin proteases studied. Marked sequence sections indicate the portions used to  
 507 design different oligopeptides for docking studies and their conservation as determined by  
 508 WebLogo server. Actual residue numbering per protein is given on the side.

509

510 A previous *in vitro* study by Pandey *et al.*, show that a FP-2 prodomain harbouring peptide 2  
 511 segment exhibited similar broad inhibitory activity on cruzain, Cat-B, Cat-L, FP-2, FP-3 and  
 512 BP-2 [92]. However, from our energy interaction profiles, a large portion of the tested  
 513 prodomain including the ERFNIN/GNFD motifs is mainly involved in anchoring it to the  
 514 catalytic domain. Thus, the main inhibitory segment is much shorter and downstream of the  
 515 GNFD motif. Peptide 2-YP-2 complex had the strongest binding association (-14.3 kcal/mol)  
 516 while VP-2 had the lowest (-10.1 kcal/mol). With the already tested peptides exhibiting  
 517 unselective high affinity binding on both human cathepsins and plasmodial proteases,  
 518 additional docking experiments were performed with a different peptide derived from the  
 519 most conserved residues in the same inhibitory segment as peptide2 from all proteases  
 520 (peptide 3 = MTFEEFKQKYLTLKSKD). In some positions within the prodomain inhibitory

521 segments across the plasmodial proteases, high residue variations were observed and there  
522 was no consensus about which residue to include in the peptide. So the properties of the  
523 residues (polar, charged, non-polar, hydrophobic) occupying such positions were compared  
524 to determine if a common chemical property was preferred.. In addition, residues showing  
525 stronger interactions with the catalytic subsite residues were also taken into account.  
526 However, the  $\Delta G$  between peptide 3 and plasmodial proteases was significantly lower in  
527 most plasmodial proteases than with the earlier peptides. Nevertheless, human cathepsins had  
528 similar binding affinity values with peptide 1 and 2. Guided by the residue interaction profile  
529 of prodomain residues with subsite residues (Figure 8 and S2), a fourth peptide (peptide 4 =  
530 EFKNKYLTLLK) composed of the most conserved amino acids around  $\alpha$ 3-helix of the  
531 inhibitory segment of all plasmodial proteases was evaluated. A similar trend of non-  
532 selectivity was observed as with peptide 1, though with lower binding affinity. A fifth  
533 peptide, similar to peptide 4 except for its length, (EFKNKYLTLLKSKD) was also evaluated.  
534 The residues in this peptide showed some conservation in the plasmodial proteases and had  
535 significant differences to the human cathepsins. Interestingly, it bound more strongly to all  
536 plasmodial proteases compared to the human cathepsins. A likely explanation of this  
537 differential binding affinity was that the peptide interacted with fewer residues on human  
538 cathepsins compared to the plasmodial proteins (Figure 10). In most of the plasmodial  
539 proteases, peptide 5 bound with almost same affinity as that of chagasin and FP-2 (-11.9  
540 kcal/mol). From the prodomain-catalytic interaction analysis (Table 5 and Figure 10), the  
541 terminal end in peptide 5 interacts with last position of S2 which consists of a charged residue  
542 (only in human plasmodial proteases) forming a strong ionic interaction as well as other non-  
543 subsite residues thus forming a stronger complex. In most plasmodial proteases, peptide 5  
544 formed multiple hydrogen bonds especially with S2 and S1' subsite residues. These two  
545 subsites residues have been found to be key in determining binding selectivity as they are the

546 main contributors to ligand binding [50]. Docking studies with previously modelled catalytic  
547 domains gave results consistent with the current models.

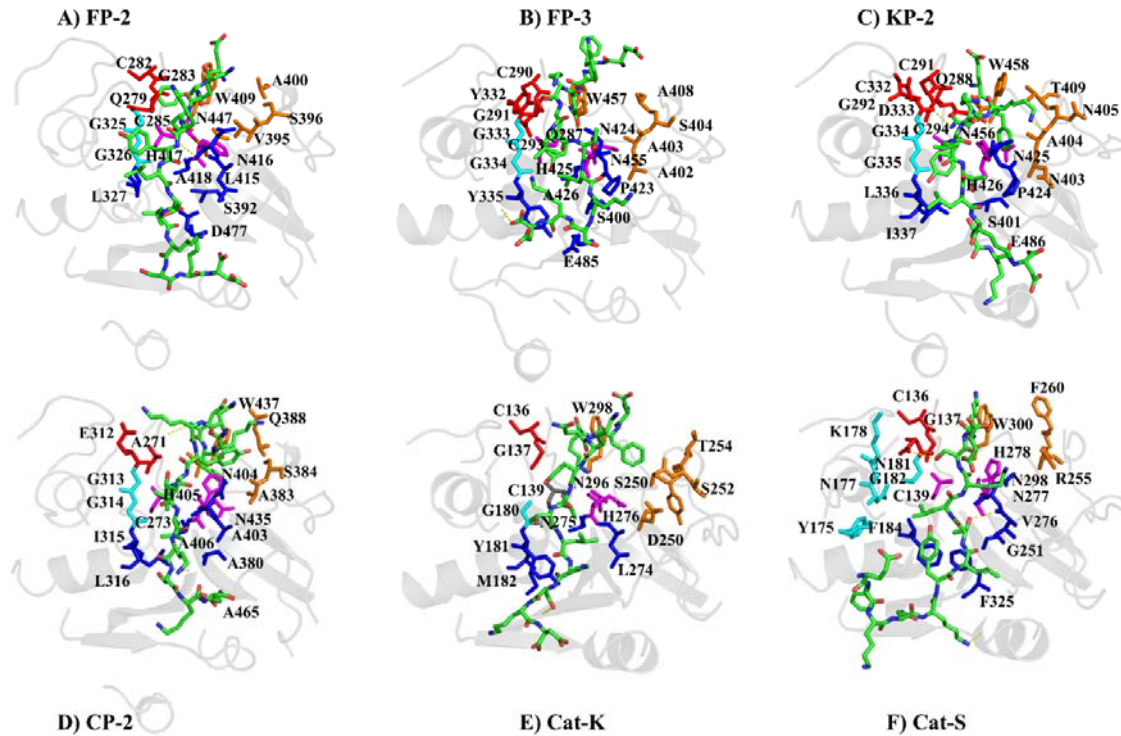

549 **Figure 10.** Peptide 5-catalytic domain subsite residue interactions of various proteins  
550 (Red=S1, Blue=S2, Cyan=S3, S1'=orange and Magenta=catalytic residues).

551  
552 From the motif analysis (Figure 6), a large proportion of peptide 5 was represented in motif  
553 M6. Despite the functional annotation of motif M4 indicating it as the cathepsin propeptide  
554 inhibitor domain, majority of its residues were predominantly involved in anchoring the  
555 prodomain. Taken together, our study is the first to identify the most key prodomain segment  
556 involved in regulation of cysteine proteases, and to apply information based approaches to  
557 propose a peptide with differential binding on both human and plasmodial proteases.

## 558 **Conclusion**

559 In the present study we aimed to characterise the differences between *P. falciparum*  
560 falcipains and their plasmodial and human homologs, especially where the prodomain  
561 interacts with the catalytic domain, in order to identify key residues which could be useful in  
562 antimalarial drug development approaches. This was done at both sequence and structure  
563 level. Through homology modelling, near native 3D partial zymogen complexes of both  
564 plasmodial and human proteases were obtained. This allowed structural characterization, thus  
565 deciphering how these segments confer their inhibitory mechanism endogenously. The main  
566 prodomain residues mediating the inhibitory effect were located in the  $\alpha 3$ -helix and the inter-  
567 joining loop region, and mostly interacted with subsite S2 and S1' residues. In our previous  
568 studies [50,57], we showed that residues forming these two subsites are critical in inhibitor  
569 design as they differ from human cathepsins. Hence, putting all the analysis together, with a  
570 continuous prodomain epitope mimicking strategy, a peptide which bound selectively more  
571 strongly on plasmodial proteases than the human ones was designed. The present approach  
572 offers a starting point which could lead to the establishment of novel antimalarial peptide  
573 drugs aimed at mimicking the natural plasmodial protease regulatory mechanism. Additional  
574 chemical modification either to obtain peptide derivatives with better physicochemical and  
575 pharmacokinetic properties as well as potency, bioavailability and stability might be  
576 necessary. Accessibility of parasite infected erythrocytes by macromolecules remains a major  
577 concern for the development of peptide based antimalarial inhibitors. A study by Farias *et al.*,  
578 using fluorescent peptides revealed that peptides with molecular weight up to 3146 Da can  
579 permeate into the blood stage parasites [93]. All the peptides determined had a mass of below  
580 2753 Da, with peptide 5 having 1613 Da, an indication that it would readily be available  
581 inside the parasites. Korde *et al.*, demonstrated that a synthetic 15-mer oligopeptide of mass  
582 1885 Da could localise into the intracellular compartments of trophozoites and schizonts

583 inhibiting FP-2 activity [91]. Additional modification of the peptide backbone as well as  
584 amino acid side chains may also be performed yielding peptide based inhibitors.

585 **Acknowledgement**

586 This work is supported by the National Research Foundation (NRF) South Africa (Grant  
587 Numbers 93690 and 105267). T.M.M and J.N.N thank Rhodes University for the  
588 postgraduate financial support. The content of this publication is solely the responsibility of  
589 the authors and does not necessarily represent the official views of the funders.

590 **Author contributions**

591 Ö.T.B conceived the project. T.M.M and J.N performed the experiments. All authors  
592 analysed the data. T.M.M and Ö.T.B wrote the article.

593 **Disclosure statement**

594 The authors declare no conflict of interest

595

596 **References**

- 597 1 WHO (2017) *World Malaria Report 2017*. Geneva.
- 598 2 Bass C & Jones CM (2016) Mosquitoes boost body armor to resist insecticide attack. *Proc.*  
599 *Natl. Acad. Sci.* **113**, 9145–9147.
- 600 3 Hemingway J, Ranson H, Magill A, Kolaczinski J, Fornadel C, Gimnig J, Coetzee M,  
601 Simard F, Roch DK, Hinzoumbe CK, Pickett J, Schellenberg D, Gething P, Hoppé M &  
602 Hamon N (2016) Averting a malaria disaster: will insecticide resistance derail malaria  
603 control? *Lancet* **387**, 1785–1788.
- 604 4 Alout H, Yameogo B, Djogbenou LS, Chandre F, Dabire RK, Corbel V & Cohuet A (2014)  
605 Interplay Between Plasmodium Infection and Resistance to Insecticides in Vector  
606 Mosquitoes. *J. Infect. Dis.* **210**, 1464–1470.
- 607 5 Tun KM, Imwong M, Lwin KM, Win AA, Hlaing TM, Hlaing T, Lin K, Kyaw MP, Plewes  
608 K, Faiz MA, Dhorda M, Cheah PY, Pukrittayakamee S, Ashley EA, Anderson TJC, Nair  
609 S, McDew-White M, Flegg JA, Grist EPM, Guerin P, Maude RJ, Smithuis F, Dondorp  
610 AM, Day NPJ, Nosten F, White NJ & Woodrow CJ (2015) Spread of artemisinin-  
611 resistant Plasmodium falciparum in Myanmar: a cross-sectional survey of the K13  
612 molecular marker. *Lancet Infect. Dis.* **15**, 415–421.
- 613 6 Takala-Harrison S, Jacob CG, Arze C, Cummings MP, Silva JC, Dondorp AM, Fukuda  
614 MM, Hien TT, Mayxay M, Noedl H, Nosten F, Kyaw MP, Nhien NTT, Imwong M,  
615 Bethell D, Se Y, Lon C, Tyner SD, Saunders DL, Arieu F, Mercereau-Puijalon O,  
616 Menard D, Newton PN, Khanthavong M, Hongvanthong B, Starzengruber P, Fuehrer H-  
617 P, Swoboda P, Khan WA, Phyo AP, Nyunt MM, Nyunt MH, Brown TS, Adams M,  
618 Pepin CS, Bailey J, Tan JC, Ferdig MT, Clark TG, Miotto O, MacInnis B, Kwiatkowski

- 619 DP, White NJ, Ringwald P & Plowe C V. (2015) Independent Emergence of  
620 Artemisinin Resistance Mutations Among Plasmodium falciparum in Southeast Asia. *J.*  
621 *Infect. Dis.* **211**, 670–679.
- 622 7 Haldar K, Bhattacharjee S & Safeukui I (2018) Drug resistance in Plasmodium. *Nat. Rev.*  
623 *Microbiol.* **16**, 156–170.
- 624 8 Fairhurst RM & Dondorp AM (2016) Artemisinin-Resistant Plasmodium falciparum  
625 Malaria. In *Emerging infections 10* pp. 409–429. American Society of Microbiology.
- 626 9 Corey VC, Lukens AK, Istvan ES, Lee MCS, Franco V, Magistrado P, Coburn-Flynn O,  
627 Sakata-Kato T, Fuchs O, Gnädig NF, Goldgof G, Linares M, Gomez-Lorenzo MG, De  
628 Cózar C, Lafuente-Monasterio MJ, Prats S, Meister S, Tanaseichuk O, Wree M, Zhou Y,  
629 Willis PA, Gamo F-J, Goldberg DE, Fidock DA, Wirth DF & Winzeler EA (2016) A  
630 broad analysis of resistance development in the malaria parasite. *Nat. Commun.* **7**,  
631 11901.
- 632 10 Deu E (2017) Proteases as antimalarial targets: strategies for genetic, chemical, and  
633 therapeutic validation. *FEBS J.* **284**, 2604–2628.
- 634 11 Paul AS & Duraisingh MT (2018) Targeting Plasmodium Proteases to Block Malaria  
635 Parasite Escape and Entry. *Trends Parasitol.* **34**, 95–97.
- 636 12 Nasamu AS, Glushakova S, Russo I, Vaupel B, Oksman A, Kim AS, Fremont DH, Tolia  
637 N, Beck JR, Meyers MJ, Niles JC, Zimmerberg J & Goldberg DE (2017) Plasmepsins  
638 IX and X are essential and druggable mediators of malaria parasite egress and invasion.  
639 *Science* **358**, 518–522.
- 640 13 Alam A (2014) Serine Proteases of Malaria Parasite Plasmodium falciparum: Potential  
641 as Antimalarial Drug Targets 1 . Global Malaria Burden and Need for. **2014**.



- 642 14 Gilson PR, Chisholm SA, Crabb BS & de Koning-Ward TF (2017) Host cell remodelling  
643 in malaria parasites: a new pool of potential drug targets. *Int. J. Parasitol.* **47**, 119–127.
- 644 15 Qidwai T (2015) Hemoglobin Degrading Proteases of Plasmodium falciparum as  
645 Antimalarial Drug Targets. *Curr. Drug Targets* **16**, 1133–1141.
- 646 16 Alam A (2017) Plasmodium Proteases as Therapeutic Targets Against Malaria. In  
647 *Proteases in Human Diseases* pp. 69–90. Springer Singapore, Singapore.
- 648 17 Sijwali PS & Rosenthal PJ (2004) Gene disruption confirms a critical role for the cysteine  
649 protease falcipain-2 in hemoglobin hydrolysis by Plasmodium falciparum. *Proc. Natl.*  
650 *Acad. Sci. U. S. A.* **101**, 4384–4389.
- 651 18 Goldberg DE (1992) Plasmodial hemoglobin degradation: an ordered pathway in a  
652 specialized organelle. *Infect. Agents Dis.* **1**, 207–211.
- 653 19 Pandey KC, Singh N, Arastu-Kapur S, Bogyo M & Rosenthal PJ (2006) Falstatin, a  
654 cysteine protease inhibitor of Plasmodium falciparum, facilitates erythrocyte invasion.  
655 *PLoS Pathog.* **2**, e117.
- 656 20 Drew ME, Banerjee R, Uffman EW, Gilbertson S, Rosenthal PJ & Goldberg DE (2008)  
657 Plasmodium food vacuole plasmepsins are activated by falcipains. *J. Biol. Chem.* **283**,  
658 12870–12876.
- 659 21 Dowse TJ, Koussis K, Blackman MJ & Soldati-Favre D (2008) Roles of proteases during  
660 invasion and egress by Plasmodium and Toxoplasma. *Subcell. Biochem.* **47**, 121–139.
- 661 22 Rosenthal PJ (2011) Falcipains and other cysteine proteases of malaria parasites. *Adv.*  
662 *Exp. Med. Biol.* **712**, 30–48.
- 663 23 Hanssen E, Knoechel C, Dearnley M, Dixon MWA, Le Gros M, Larabell C & Tilley L  
664 (2012) Soft X-ray microscopy analysis of cell volume and hemoglobin content in

- 665 erythrocytes infected with asexual and sexual stages of *Plasmodium falciparum*. *J.*  
666 *Struct. Biol.* **177**, 224–232.
- 667 24 Krugliak M, Zhang J & Ginsburg H (2002) Intraerythrocytic *Plasmodium falciparum*  
668 utilizes only a fraction of the amino acids derived from the digestion of host cell cytosol  
669 for the biosynthesis of its proteins. *Mol. Biochem. Parasitol.* **119**, 249–256.
- 670 25 Istvan ES, Dharia N V, Bopp SE, Gluzman I, Winzeler EA & Goldberg DE (2011)  
671 Validation of isoleucine utilization targets in *Plasmodium falciparum*. *Proc. Natl. Acad.*  
672 *Sci. U. S. A.* **108**, 1627–32.
- 673 26 Liu J, Istvan ES, Gluzman IY, Gross J & Goldberg DE (2006) *Plasmodium falciparum*  
674 ensures its amino acid supply with multiple acquisition pathways and redundant  
675 proteolytic enzyme systems. *Proc. Natl. Acad. Sci. U. S. A.* **103**, 8840–5.
- 676 27 Francis SE, Sullivan Jr DJ & Goldberg DE (1997) Hemoglobin metabolism in the malaria  
677 parasite *Plasmodium falciparum*. *Annu. Rev. Microbiol.* **51**, 97–123.
- 678 28 Greenbaum DC, Baruch A, Grainger M, Bozdech Z, Medzihradzky KF, Engel J, DeRisi  
679 J, Holder AA & Bogyo M (2002) A role for the protease falcipain 1 in host cell invasion  
680 by the human malaria parasite. *Science* **298**, 2002–2006.
- 681 29 Eksi S, Czesny B, Greenbaum DC, Bogyo M & Williamson KC (2004) Targeted  
682 disruption of *Plasmodium falciparum* cysteine protease, falcipain 1, reduces oocyst  
683 production, not erythrocytic stage growth. *Mol. Microbiol.* **53**, 243–250.
- 684 30 Sijwali PS, Kato K, Seydel KB, Gut J, Lehman J, Klemba M, Goldberg DE, Miller LH &  
685 Rosenthal PJ (2004) *Plasmodium falciparum* cysteine protease falcipain-1 is not  
686 essential in erythrocytic stage malaria parasites. *Proc. Natl. Acad. Sci.* **101**, 8721–8726.
- 687 31 Singh N, Sijwali PS, Pandey KC & Rosenthal PJ (2006) *Plasmodium falciparum*:

- 688           biochemical characterization of the cysteine protease falcipain-2'. *Exp. Parasitol.* **112**,  
689           187–92.
- 690   32 Pandey KC & Dixit R (2012) Structure-function of falcipains: malarial cysteine proteases.  
691           *J. Trop. Med.* **2012**, 345195.
- 692   33 Hanspal M, Dua M, Takakuwa Y, Chishti AH & Mizuno A (2002) Plasmodium  
693           falciparum cysteine protease falcipain-2 cleaves erythrocyte membrane skeletal proteins  
694           at late stages of parasite development. *Blood* **100**, 1048–1054.
- 695   34 Dua M, Raphael P, Sijwali PS, Rosenthal PJ & Hanspal M (2001) Recombinant falcipain-  
696           2 cleaves erythrocyte membrane ankyrin and protein 4.1. *Mol. Biochem. Parasitol.* **116**,  
697           95–99.
- 698   35 Dhawan S, Dua M, Chishti AH & Hanspal M (2003) Ankyrin peptide blocks falcipain-2-  
699           mediated malaria parasite release from red blood cells. *J. Biol. Chem.* **278**, 30180–6.
- 700   36 Sijwali PS, Koo J, Singh N & Rosenthal PJ (2006) Gene disruptions demonstrate  
701           independent roles for the four falcipain cysteine proteases of Plasmodium falciparum.  
702           *Mol. Biochem. Parasitol.* **150**, 96–106.
- 703   37 Sijwali PS, Shenai BR, Gut J, Singh A & Rosenthal PJ (2001) Expression and  
704           characterization of the Plasmodium falciparum haemoglobinase falcipain-3. *Biochem. J.*  
705           **360**, 481–489.
- 706   38 Teixeira C, Gomes JRB & Gomes P (2011) Falcipains, Plasmodium falciparum cysteine  
707           proteases as key drug targets against malaria. *Curr. Med. Chem.* **18**, 1555–1572.
- 708   39 Marco M & Coteron JM (2012) Falcipain inhibition as a promising antimalarial target.  
709           *Curr. Top. Med. Chem.* **12**, 408–444.
- 710   40 Siddiqui FA, Cabrera M, Wang M, Brashear A, Kemirembe K, Wang Z, Miao J,

- 711 Chookajorn T, Yang Z, Cao Y, Dong G, Rosenthal PJ & Cui L (2018) Plasmodium  
712 falciparum Falcipain-2a Polymorphisms in Southeast Asia and Their Association With  
713 Artemisinin Resistance. *J. Infect. Dis.*
- 714 41 Na BK, Shenai BR, Sijwali PS, Choe Y, Pandey KC, Singh A, Craik CS & Rosenthal PJ  
715 (2004) Identification and biochemical characterization of vivapains, cysteine proteases  
716 of the malaria parasite Plasmodium vivax. *Biochem. J.* **378**, 529–538.
- 717 42 Prasad R, Atul P, Soni A, Puri SK & Sijwali PS (2012) Expression, Characterization, and  
718 Cellular Localization of Knowpains, Papain-Like Cysteine Proteases of the Plasmodium  
719 knowlesi Malaria Parasite. *PLoS One* **7**, e51619.
- 720 43 Pei Y, Miller JL, Lindner SE, Vaughan AM, Torii M & Kappe SH (2013) Plasmodium  
721 yoelii inhibitor of cysteine proteases is exported to exomembrane structures and  
722 interacts with yoelipain-2 during asexual blood-stage development. *Cell. Microbiol.*
- 723 44 Caldeira RL, Gonçalves LMD, Martins TM, Silveira H, Novo C, Rosário V do &  
724 Domingos A (2009) Plasmodium chabaudi: Expression of active recombinant  
725 chabaupain-1 and localization studies in Anopheles sp. *Exp. Parasitol.* **122**, 97–105.
- 726 45 Rosenthal PJ & Nelson RG (1992) Isolation and characterization of a cysteine proteinase  
727 gene of Plasmodium falciparum. *Mol. Biochem. Parasitol.* **51**, 143–152.
- 728 46 Shenai BR, Sijwali PS, Singh A & Rosenthal PJ (2000) Characterization of native and  
729 recombinant falcipain-2, a principal trophozoite cysteine protease and essential  
730 hemoglobinase of Plasmodium falciparum. *J. Biol. Chem.* **275**, 29000–29010.
- 731 47 Tastan Bishop O & Kroon M (2011) Study of protein complexes via homology modeling,  
732 applied to cysteine proteases and their protein inhibitors. *J. Mol. Model.* **17**, 3163–72.
- 733 48 Rennenberg A, Lehmann C, Heitmann A, Witt T, Hansen G, Nagarajan K, Deschermeier

- 734 C, Turk V, Hilgenfeld R & Heussler VT (2010) Exoerythrocytic Plasmodium parasites  
735 secrete a cysteine protease inhibitor involved in sporozoite invasion and capable of  
736 blocking cell death of host hepatocytes. *PLoS Pathog.* **6**, e1000825.
- 737 49 Monteiro AC, Abrahamson M, Lima AP, Vannier-Santos MA & Scharfstein J (2001)  
738 Identification, characterization and localization of chagasin, a tight-binding cysteine  
739 protease inhibitor in *Trypanosoma cruzi*. *J. Cell Sci.* **114**, 3933–3942.
- 740 50 Musyoka TM, Kanzi AM, Lobb KA & Tasthan Bishop Ö (2016) Analysis of non-peptidic  
741 compounds as potential malarial inhibitors against Plasmodial cysteine proteases via  
742 integrated virtual screening workflow. *J. Biomol. Struct. Dyn.* **34**, 2084–2101.
- 743 51 Sajid M & McKerrow JH (2002) Cysteine proteases of parasitic organisms. *Mol. Biochem.*  
744 *Parasitol.* **120**, 1–21.
- 745 52 Dahl EL & Rosenthal PJ (2005) Biosynthesis, localization, and processing of falcipain  
746 cysteine proteases of *Plasmodium falciparum*. *Mol. Biochem. Parasitol.* **139**, 205–212.
- 747 53 Rozman J, Stojan J, Kuhelj R, Turk V & Turk B (1999) Autocatalytic processing of  
748 recombinant human procathepsin B is a bimolecular process. *FEBS Lett.* **459**, 358–62.
- 749 54 Cotrin SS, Gouvêa IE, Melo PMS, Bagnaresi P, Assis DM, Araújo MS, Juliano MA,  
750 Gazarini ML, Rosenthal PJ, Juliano L & Carmona AK (2013) Substrate specificity  
751 studies of the cysteine peptidases falcipain-2 and falcipain-3 from *Plasmodium*  
752 *falciparum* and demonstration of their kininogenase activity. *Mol. Biochem. Parasitol.*  
753 **187**, 111–116.
- 754 55 Chakka SK, Kalamuddin M, Sundararaman S, Wei L, Mundra S, Mahesh R, Malhotra P,  
755 Mohammed A & Kotra LP (2015) Identification of novel class of falcipain-2 inhibitors as  
756 potential antimalarial agents. *Bioorg. Med. Chem.* **23**, 2221–2240.

- 757 56 Hernández González JE, Hernández Alvarez L, Pascutti PG & Valiente PA (2017)  
758 Predicting binding modes of reversible peptide-based inhibitors of falcipain-2 consistent  
759 with structure-activity relationships. *Proteins Struct. Funct. Bioinforma.* **85**, 1666–1683.
- 760 57 Musyoka TMTM, Kanzi AMAM, Lobb KAKA, Tastan Bishop Ö & Bishop ÖT (2016)  
761 Structure Based Docking and Molecular Dynamic Studies of Plasmodial Cysteine  
762 Proteases against a South African Natural Compound and its Analogs. *Nat. Publ. Gr.* **6**,  
763 1–12.
- 764 58 Coteron JM, Catterick D, Castro J, Chaparro MJ, Diaz B, Fernandez E, Ferrer S, Gamo FJ,  
765 Gordo M, Gut J, de las Heras L, Legac J, Marco M, Miguel J, Munoz V, Porras E, de la  
766 Rosa JC, Ruiz JR, Sandoval E, Ventosa P, Rosenthal PJ & Fiandor JM (2010) Falcipain  
767 inhibitors: optimization studies of the 2-pyrimidinecarbonitrile lead series. *J. Med.*  
768 *Chem.* **53**, 6129–6152.
- 769 59 Domínguez JN, León C, Rodrigues J, Gamboa de Domínguez N, Gut J & Rosenthal PJ  
770 (2005) Synthesis and evaluation of new antimalarial phenylurenyl chalcone derivatives.  
771 *J. Med. Chem.* **48**, 3654–8.
- 772 60 Rudrapal M, Chetia D & Singh V (2017) Novel series of 1,2,4-trioxane derivatives as  
773 antimalarial agents. *J. Enzyme Inhib. Med. Chem.* **32**, 1159–1173.
- 774 61 Himangini, Pathak DP, Sharma V & Kumar S (2018) Designing novel inhibitors against  
775 falcipain-2 of Plasmodium falciparum. *Bioorg. Med. Chem. Lett.* **28**, 1566–1569.
- 776 62 Ehmke V, Kilchmann F, Heindl C, Cui K, Huang J, Schirmeister T & Diederich F (2011)  
777 Peptidomimetic nitriles as selective inhibitors for the malarial cysteine protease  
778 falcipain-2. *Medchemcomm* **2**, 800.
- 779 63 Mane UR, Gupta RC, Nadkarni SS, Giridhar RR, Naik PP & Yadav MR (2013) Falcipain

- 780 inhibitors as potential therapeutics for resistant strains of malaria: a patent review.  
781 *Expert Opin. Ther. Pat.* **23**, 165–87.
- 782 64 Njuguna JN (2012) Structural Analysis of Prodomain Inhibition of Cysteine Proteases in  
783 Plasmodium Species. Rhodes University.
- 784 65 Aurrecochea C, Brestelli J, Brunk BP, Dommer J, Fischer S, Gajria B, Gao X, Gingle A,  
785 Grant G, Harb OS, Heiges M, Innamorato F, Iodice J, Kissinger JC, Kraemer E, Li W,  
786 Miller JA, Nayak V, Pennington C, Pinney DF, Roos DS, Ross C, Stoeckert CJ,  
787 Treatman C & Wang H (2009) PlasmoDB: a functional genomic database for malaria  
788 parasites. *Nucleic Acids Res.* **37**, D539–43.
- 789 66 Benson DA, Karsch-Mizrachi I, Lipman DJ, Ostell J & Sayers EW (2009) GenBank.  
790 *Nucleic Acids Res.* **37**, D26–31.
- 791 67 Pei J, Kim BH & Grishin N V (2008) PROMALS3D: a tool for multiple protein sequence  
792 and structure alignments. *Nucleic Acids Res.* **36**, 2295–2300.
- 793 68 Waterhouse AM, Procter JB, Martin DMA, Clamp M & Barton GJ (2009) Jalview  
794 Version 2--a multiple sequence alignment editor and analysis workbench.  
795 *Bioinformatics* **25**, 1189–1191.
- 796 69 Tamura K, Peterson D, Peterson N, Stecher G, Nei M & Kumar S (2011) MEGA5:  
797 molecular evolutionary genetics analysis using maximum likelihood, evolutionary  
798 distance, and maximum parsimony methods. *Mol. Biol. Evol.* **28**, 2731–2739.
- 799 70 Bailey TL, Williams N, Misleh C & Li WW (2006) MEME: discovering and analyzing  
800 DNA and protein sequence motifs. *Nucleic Acids Res.* **34**, W369–73.
- 801 71 Bailey TL & Gribskov M (1998) Combining evidence using p-values: application to  
802 sequence homology searches. *Bioinformatics* **14**, 48–54.

- 803 72 Webb B & Sali A (2016) Comparative Protein Structure Modeling Using MODELLER.  
804 *Curr. Protoc. Bioinforma.* **54**, 5.6.1-5.6.37.
- 805 73 Shen M-Y & Sali A (2006) Statistical potential for assessment and prediction of protein  
806 structures. *Protein Sci.* **15**, 2507–24.
- 807 74 Wiederstein M & Sippl MJ (2007) ProSA-web: interactive web service for the recognition  
808 of errors in three-dimensional structures of proteins. *Nucleic Acids Res.* **35**, W407–  
809 W410.
- 810 75 Eisenberg D, Lüthy R & Bowie JU (1997) VERIFY3D: Assessment of protein models  
811 with three-dimensional profiles. In *Methods in enzymology* pp. 396–404.
- 812 76 Benkert P, Tosatto SCE & Schomburg D (2008) QMEAN: A comprehensive scoring  
813 function for model quality assessment. *Proteins* **71**, 261–77.
- 814 77 Laskowski RA, MacArthur MW, Moss DS & Thornton JM (1993) PROCHECK: a  
815 program to check the stereochemical quality of protein structures. *J. Appl. Crystallogr.*  
816 **26**, 283–291.
- 817 78 Tina KG, Bhadra R & Srinivasan N (2007) PIC: Protein Interactions Calculator. *Nucleic*  
818 *Acids Res.* **35**, W473–W476.
- 819 79 Galgonek J, Vymětal J, Jakubec D & Vondrášek J (2017) Amino Acid Interaction  
820 (INTAA) web server. *Nucleic Acids Res.* **29**, 2860–2874.
- 821 80 Crooks G, Hon G, Chandonia J & Brenner S (2004) WebLogo: a sequence logo generator.  
822 *Genome Res* **14**, 1188–1190.
- 823 81 Kurcinski M, Jamroz M, Blaszczyk M, Kolinski A & Kmiecik S (2015) CABS-dock web  
824 server for the flexible docking of peptides to proteins without prior knowledge of the  
825 binding site. *Nucleic Acids Res.* **43**, W419-24.



- 826 82 Xue LC, Rodrigues JP, Kastritis PL, Bonvin AM & Vangone A (2016) PRODIGY: a web  
827 server for predicting the binding affinity of protein–protein complexes. *Bioinformatics*  
828 **32**, 3676–3678.
- 829 83 Guruprasad K, Reddy BVB & Pandit MW (1990) Correlation between stability of a  
830 protein and its dipeptide composition: a novel approach for predicting *in vivo* stability of  
831 a protein from its primary sequence. *Protein Eng. Des. Sel.* **4**, 155–161.
- 832 84 Kreuzsch S, Fehn M, Maubach G, Nissler K, Rommerskirch W, Schilling K, Weber E,  
833 Wenz I & Wiederanders B (2000) An evolutionarily conserved tripartite tryptophan  
834 motif stabilizes the prodomains of cathepsin L-like cysteine proteases. *Eur. J. Biochem.*  
835 **267**, 2965–2972.
- 836 85 De Castro E, Sigrist CJA, Gattiker A, Bulliard V, Langendijk-Genevaux PS, Gasteiger E,  
837 Bairoch A & Hulo N (2006) ScanProsite: detection of PROSITE signature matches and  
838 ProRule-associated functional and structural residues in proteins. *Nucleic Acids Res.* **34**,  
839 W362–W365.
- 840 86 Pagni M, Ioannidis V, Cerutti L, Zahn-Zabal M, Jongeneel CV & Falquet L (2004)  
841 MyHits: a new interactive resource for protein annotation and domain identification.  
842 *Nucleic Acids Res.* **32**, W332-5.
- 843 87 Sundararaj S, Singh D, Saxena AK, Vashisht K, Sijwali PS, Dixit R & Pandey KC (2012)  
844 The Ionic and Hydrophobic Interactions Are Required for the Auto Activation of  
845 Cysteine Proteases of *Plasmodium falciparum*. *PLoS One* **7**, e47227.
- 846 88 Fosgerau K & Hoffmann T (2015) Peptide therapeutics: current status and future  
847 directions. *Drug Discov. Today* **20**, 122–128.
- 848 89 Henninot A, Collins JC & Nuss JM (2018) The Current State of Peptide Drug Discovery:

- 849           Back to the Future? *J. Med. Chem.* **61**, 1382–1414.
- 850   90 Rizzi L, Sundararaman S, Cendic K, Vaiana N, Korde R, Sinha D, Mohmmmed A, Malhotra  
851           P & Romeo S (2011) Design and synthesis of protein-protein interaction mimics as  
852           Plasmodium falciparum cysteine protease, falcipain-2 inhibitors. *Eur. J. Med. Chem.* **46**,  
853           2083–90.
- 854   91 Korde R, Bhardwaj A, Singh R, Srivastava A, Chauhan VS, Bhatnagar RK & Malhotra P  
855           (2008) A Prodomain Peptide of *Plasmodium falciparum* Cysteine Protease (Falcipain-2)  
856           Inhibits Malaria Parasite Development. *J. Med. Chem.* **51**, 3116–3123.
- 857   92 Pandey KC, Barkan DT, Sali A & Rosenthal PJ (2009) Regulatory elements within the  
858           prodomain of Falcipain-2, a cysteine protease of the malaria parasite Plasmodium  
859           falciparum. *PLoS One* **4**, e5694.
- 860   93 Farias SL, Gazarini ML, Melo RL, Hirata IY, Juliano MA, Juliano L & Garcia CRS  
861           (2005) Cysteine-protease activity elicited by Ca<sup>2+</sup> stimulus in Plasmodium. *Mol.*  
862           *Biochem. Parasitol.* **141**, 71–79.
- 863
- 864

865 Table 1. Details of all protein sequences retrieved from PlasmoDB and NCBI databases. Percentage  
 866 sequence identity (SI) is calculated based on the partial zymogen of query sequence (QS) and that of  
 867 corresponding homolog.

| Source Organism           | Host    | Accession Number | Common name (abbreviation) | aa  | % SI            |
|---------------------------|---------|------------------|----------------------------|-----|-----------------|
| <i>P. falciparum</i> (Pf) | Human   | PF3D7_1115700    | Falcipain-2 (FP-2)         | 484 | QS              |
|                           |         | PF3D7_1115400    | Falcipain-3 (FP-3)         | 492 | QS              |
| <i>P. vivax</i> (Pv)      |         | PVX_091415       | Vivapain-2 (VP-2)          | 487 | 56 <sup>a</sup> |
|                           |         | PVX_091410       | Vivapain-3 (VP-3)          | 493 | 55 <sup>b</sup> |
| <i>P. knowlesi</i> (Pk)   | Human / | PKH_091250       | Knowlesipain-2 (KP-2)      | 495 | 53 <sup>a</sup> |
|                           | Monkey  | PVX-091260       | Knowlesipain-3 (KP-3)      | 479 | 58 <sup>b</sup> |
| <i>P. yoelii</i> (Py)     | Rodents | PY00783          | Yoelipain-2 (YP-2)         | 472 | 47 <sup>a</sup> |
| <i>P. chabaudi</i> (Pc)   |         | PCHAS_091190     | Chabaupain-2 (CP-2)        | 471 | 48 <sup>b</sup> |
| <i>P. berghei</i> (Pb)    |         | PBANKA_09324     | Berghepain-2 (BP-2)        | 470 | 50 <sup>a</sup> |
| <i>H. sapiens</i>         | -       | NP_000387.1      | Cathepsin-K (Cat-K)        | 329 | 34 <sup>a</sup> |
|                           |         | AAA66974.1       | Cathepsin-L (Cat-L)        | 333 | 33 <sup>a</sup> |
|                           |         | AAC37592.1       | Cathepsin-S (Cat-S)        | 331 | 32 <sup>a</sup> |

868 a=FP-2 homolog, <sup>b</sup>=FP-3 homolog

869 Table 2. Homology model quality validation scores of partial zymogen complexes using different  
870 assessment tools.

| Protein      | Z-DOPE | Verify3D | ProSA | QMEAN | RAMACHADRAN (%) |         |            |
|--------------|--------|----------|-------|-------|-----------------|---------|------------|
|              |        |          |       |       | Favoured        | Allowed | Disallowed |
| <b>FP-2</b>  | -1.05  | 78.48    | -8.27 | 0.69  | 88.90           | 10.50   | 0.60       |
| <b>FP-3</b>  | -0.94  | 84.64    | -7.84 | 0.67  | 89.70           | 10.30   | 0.00       |
| <b>VP-2</b>  | -0.64  | 81.27    | -6.94 | 0.62  | 85.40           | 13.90   | 0.70       |
| <b>VP-3</b>  | -0.74  | 79.58    | -7.31 | 0.70  | 88.60           | 11.40   | 0.00       |
| <b>KP-2</b>  | -0.63  | 85.89    | -7.23 | 0.62  | 89.30           | 9.70    | 1.00       |
| <b>KP-3</b>  | -0.92  | 90.63    | -7.88 | 0.63  | 86.10           | 13.90   | 0.00       |
| <b>BP-2</b>  | -0.62  | 86.85    | -7.75 | 0.63  | 86.60           | 12.40   | 1.00       |
| <b>CP-2</b>  | -0.60  | 84.45    | -7.02 | 0.63  | 83.90           | 13.80   | 2.30       |
| <b>YP-2</b>  | -0.42  | 75.54    | -7.28 | 0.62  | 84.90           | 14.40   | 0.70       |
| <b>Cat-L</b> | -1.47  | 87.38    | -7.94 | 0.87  | 89.80           | 9.80    | 0.40       |
| <b>Cat-S</b> | -1.61  | 85.39    | -8.57 | 0.79  | 89.20           | 10.40   | 0.20       |
| <b>1BY8</b>  | *      | 85.16    | -8.62 | 0.78  | 65.80           | 34.20   | 0.00       |
| <b>2O6X</b>  | *      | 94.77    | -7.00 | 0.77  | 90.50           | 9.50    | 0.00       |
| <b>2OUL</b>  | *      | 98.13    | -7.90 | 0.75  | 88.10           | 11.20   | 0.70       |
| <b>3BWK</b>  | *      | 93.51    | -7.35 | 0.65  | 86.10           | 13.30   | 0.60       |

871 \*=Template

872

873 Table 3. A summary of physicochemical properties of FP-2 and FP-3 and homologs partial zymogen  
874 sequences. Included also are properties where catalytic domain significantly varied from partial  
875 zymogen sequence.

| Protein      | Aromaticity | GRAVY | Instability index | Mwgt     |           | pI      |           |
|--------------|-------------|-------|-------------------|----------|-----------|---------|-----------|
|              |             |       |                   | Complex  | Catalytic | Complex | Catalytic |
| <b>FP-2</b>  | 0.12        | -0.59 | 40.31             | 38021.06 | 27176.69  | 6.50    | 4.94      |
| <b>FP-3</b>  | 0.14        | -0.53 | 33.90             | 38029.91 | 27348.62  | 5.47    | 4.72      |
| <b>VP-2</b>  | 0.14        | -0.40 | 23.78             | 37941.11 | 27388.93  | 5.49    | 4.74      |
| <b>VP-3</b>  | 0.14        | -0.47 | 28.92             | 38405.76 | 28088.95  | 5.60    | 5.00      |
| <b>KP-2</b>  | 0.14        | -0.54 | 29.55             | 38583.83 | 27947.73  | 5.69    | 4.93      |
| <b>KP-3</b>  | 0.14        | -0.51 | 23.16             | 38284.39 | 27685.36  | 5.89    | 5.13      |
| <b>BP-2</b>  | 0.14        | -0.52 | 39.73             | 38014.94 | 27367.90  | 5.44    | 4.77      |
| <b>CP-2</b>  | 0.13        | -0.47 | 52.14             | 37883.92 | 27140.51  | 5.14    | 4.54      |
| <b>YP-2</b>  | 0.14        | -0.46 | 40.05             | 38120.25 | 27454.06  | 5.66    | 4.78      |
| <b>Cat-K</b> | 0.10        | -0.62 | 33.12             | 34566.05 | 23495.47  | 8.83    | 8.92      |
| <b>Cat-L</b> | 0.13        | -0.70 | 38.17             | 35074.20 | 24298.86  | 5.33    | 4.64      |
| <b>Cat-S</b> | 0.12        | -0.56 | 37.20             | 34986.63 | 23963.97  | 8.44    | 7.64      |

876

877

878 Table 4. Amino acid sequences of proposed peptides, their predicted binding affinity values ( $\Delta G$  -  
 879 kcalmol<sup>-1</sup>) and dissociation constant ( $K_d$ ) with individual catalytic domains of the different proteins  
 880 studied.

| Protein      | Peptide    |           |            |           |            |         |            |         |            |           |
|--------------|------------|-----------|------------|-----------|------------|---------|------------|---------|------------|-----------|
|              | 1          |           | 2          |           | 3          |         | 4          |         | 5          |           |
|              | $\Delta G$ | $K_D$ (M) | $\Delta G$ | $K_D$ (M) | $\Delta G$ | $K_D$   | $\Delta G$ | $K_D$   | $\Delta G$ | $K_D$ (M) |
| <b>FP-2</b>  | -11.8      | 2.2E-09   | -11.2      | 8.4E-09   | -8.1       | 1.2E-06 | -9         | 2.7E-07 | -11.4      | 4.4E-09   |
| <b>FP-3</b>  | -12.2      | 1.2E-09   | -10.5      | 2.0E-08   | -9.6       | 9.4E-08 | -9.7       | 7.8E-08 | -12.3      | 8.8E-10   |
| <b>VP-2</b>  | -11.0      | 8.3E-09   | -10.1      | 3.8E-08   | -12.3      | 8.8E-10 | -9.0       | 2.7E-07 | -10.9      | 1.1E-08   |
| <b>VP-3</b>  | -11.7      | 2.7E-09   | -11.0      | 8.3E-09   | -9.9       | 5.7E-08 | -9.2       | 1.7E-07 | -11.8      | 2.1E-09   |
| <b>KP-2</b>  | -12.7      | 4.7E-10   | -11.8      | 2.1E-09   | -6.7       | 1.3E-05 | -8.1       | 1.2E-06 | -10.6      | 1.8E-08   |
| <b>KP-3</b>  | -11.8      | 2.1E-09   | -12.7      | 5.2E-10   | -9.3       | 1.4E-07 | -9.2       | 1.9E-07 | -12.7      | 5.2E-10   |
| <b>BP-2</b>  | -11.5      | 3.7E-09   | -12.2      | 1.2E-09   | -10.9      | 9.9E-09 | -7.9       | 1.7E-06 | -11.7      | 2.7E-09   |
| <b>CP-2</b>  | -11.9      | 2.2E-09   | -11.7      | 2.7E-09   | -8.7       | 3.9E-07 | -8.3       | 1.1E-07 | -12.7      | 4.7E-10   |
| <b>YP-2</b>  | -11.7      | 2.7E-09   | -14.3      | 5.5E-11   | -12.4      | 7.9E-10 | -10.4      | 2.5E-08 | -9.3       | 1.5E-07   |
| <b>Cat-K</b> | -13.9      | 6.3E-11   | -11.5      | 3.5E-09   | -11.9      | 2.0E-09 | -11.4      | 4.2E-09 | -8.3       | 1.1E-07   |
| <b>Cat-L</b> | -12.2      | 1.0E-09   | -11.8      | 5.1E-09   | -12.3      | 9.7E-10 | -10.2      | 3.5E-08 | -8.7       | 9.2E-07   |
| <b>Cat-S</b> | -10.4      | 2.4E-09   | -11.5      | 3.5E-09   | -12.4      | 7.7E-10 | -9.9       | 5.2E-08 | -8.6       | 4.8E-07   |

881 \*FP-2 complex with chagasin:  $\Delta G$  -11.9,  $K_D$ =1.9e-09.

882 **Peptide 1** <sup>N</sup>RFGDLSFEFFKKKYLNLKLF<sup>D</sup>, **2** <sup>L</sup>TYHEFKNKYLSLRSSK, **3** <sup>M</sup>TFFEFKQKYLTKSKD, **4** <sup>E</sup>FKNKYLTLK, **5** <sup>E</sup>FKNKYLTKSKD

883

884 Table 5. Peptide 5-catalytic domain residue interaction fingerprint. Bold are residues forming  
885 hydrogen bonds with the peptide.

| Protein      | Subsite                          |                                                     |                             |                                                          | Non-subsite residues                                             |
|--------------|----------------------------------|-----------------------------------------------------|-----------------------------|----------------------------------------------------------|------------------------------------------------------------------|
|              | S1                               | S2                                                  | S3                          | S1'                                                      |                                                                  |
| <b>FP-2</b>  | Q279,C28<br>2,G283               | L327, <b>I328</b> ,<br>S392,L415,N4<br>16,A418,D477 | G325,G32<br>6               | V395,S396,A400,<br><b>H417</b> ,A418,N447,<br>W449       | K280,W286,R47<br>0,C285                                          |
| <b>FP-3</b>  | Q287,C29<br>0,G291,Y<br>332      | <b>Y335</b> ,S400,P4<br>23,A426,E485                | G334,G33<br>5               | A402,A403,S404,<br>A408, <b>N424</b> ,H425,<br>N455,W457 | L289,C293,W29<br>4,N338                                          |
| <b>VP-2</b>  | Q282,G28<br>6,Y327               | F330,I331,P41<br>8,N419,A421                        | Q322,N32<br>3               | I396,A397,V398,<br>A403,H420,N451                        | D282,F331,P332,<br>Y351,E367,F389                                |
| <b>VP-3</b>  | G292,D33<br>3                    | N336,I337,S40<br>1,P424,N425                        | G334,G33<br>5               | A404,V409,Y410,<br><b>H426</b> ,W458                     | D287,K289,C294<br>,D406,S423,S457<br>,G459,K458,W4<br>62         |
| <b>KP-2</b>  | Q288,C29<br>1,G292,C<br>332,D333 | L336,I337,S40<br>1,P424, <b>N425</b> ,<br>A427,E486 | G333,G33<br>4               | N403,A404,N405,<br>T409,H426,N456,<br>W458               | <b>K289</b> ,N290,A29<br>3,C294,W295,E3<br>82,N405,D406,S<br>457 |
| <b>KP-3</b>  | C277,G27<br>8,C318,D<br>319      | F322,N387,T4<br>10,N411, <b>E472</b>                | Q314,N31<br>6,G320,G<br>321 | V390,S391,A395,<br><b>H412</b> ,N442,W444                | G275,S279,C280<br>,P324,R325,E368<br>,N387,D392,T40<br>9         |
| <b>BP-2</b>  | Q264,A26<br>8,C308,E<br>309      | I312,A377, <b>A4</b><br><b>00</b> ,N401,A403        | N304,N30<br>5,F306,G3<br>11 | V378,G379,D381,<br>H402,N432,W434                        | K266,A272,P314<br>,Y334,E349,A36<br>7,I376                       |
| <b>CP-2</b>  | Q267,C27<br>0,A271,E<br>312      | I315,L316,A38<br>0,A303, <b>N404</b> ,<br>A406      | N307,N30<br>8,D309,G<br>314 | V381,G382,A383,<br>S384, <b>H405</b> ,N437               | K265,W274,Q30<br>6,P337,K351                                     |
| <b>YP-2</b>  | C271,A27<br>2,D313               | I316,L317,A38<br>1,A404, <b>N405</b> ,<br>A407      | N308,N30<br>9,F310,G3<br>14 | V382,G383,V384,<br>A385,H406,N438                        | Q269,W275,F31<br>0,E353,I380                                     |
| <b>Cat-K</b> | C136,G13<br>7                    | Y181,M182,A<br>248,L274,N27<br>5,A277               | G179                        | D250,A251,S252,<br>H276                                  | C139,W140,F18<br>6,Y224,F256,W3<br>02,E226                       |
| <b>Cat-L</b> | C135,N17<br>9                    | L182,<br>A248,D275,G2<br>77                         | N175                        | I249,A251,L257,<br>H276                                  | P172,G224,A234<br>,I263                                          |
| <b>Cat-S</b> | C134, <b>N17</b><br><b>9</b>     | F182,G249,V2<br>74, <b>N275</b> ,F323               | N175,K17<br>6,G180          | R253,F258,W298                                           | Y173,Y225,E227<br>,P229,Y230                                     |

886

887
